# Supplementary material for: On the mechanism of the photoinduced magnetism in copper octacyanomolybdates
Source: Royal Society of Chemistry journal article supplement (doi:10.1039/c0cc00792g), 2010-01-01

## On the mechanism of the photoinduced magnetism in copper octacyanomolybdates

### Supporting Information

Maria-Angels Carvajal, Mar Reguero, Coen de Graaf

#### Index

|                                              |    |
|----------------------------------------------|----|
| S1. Computational Details .....              | 1  |
| S2. Cartesian coordinates.....               | 3  |
| S3. Absolute CASSCF and CASPT2 energies..... | 31 |

#### S1. Computational Details

Geometry optimization has been carried out using DFT methods, since they are known to yield very reliable results, in order to obtain the optimal geometry for each of the electronic states considered for the metallic centers:

a)  $[\text{Cu}(\text{CNH})(\text{tris}(2\text{-aminoethyl})\text{amine})]^{2+/1+}$ : Cu TZV<sup>1</sup> and SV<sup>2</sup> basis set for N, C, H. Other basis sets and functionals were used for testing purposes and the results did not vary significantly. Specifically, the functional B3LYP and the following basis sets: Los Alamos ECP LanL2dz for Mo and D95V<sup>3</sup> for C, N and H, Cu: TZV, N: DZV, C and H SV.

b)  $[\text{Mo}(\text{CNH})_4(\text{CN})_2]^{2+/3+}$ : LanL2DZ ECP for Mo and SV basis set for N, C, H. Other basis sets were used for testing purposes and the results did not vary significantly. Specifically, Los Alamos ECP LanL2DZ for Mo and D95V for C, N and H, Stuttgart SDD ECP for Mo, and SV for N, C, H, and SDD ECP for Mo, and TZV for N, C, H.

The objective of the ONIOM calculations was to check the reliability of the changes in the coordination sphere of Mo for the different electronic states considered, obtained by optimization of the model  $[\text{Mo}(\text{CNH})_6(\text{CN})_2]^{2+}$ , compared with the behavior of the  $[\text{Mo}(\text{CN})_2(\text{CN-Cu}(\text{tris}(2\text{-aminoethyl})\text{amine})_6)]^{8+}$  molecule. For this reason only the Mo and the eight CN coordinated to the metal were included in the QM part. The Cu atoms and the tris(2-aminoethyl)amine ligand were left in the MM part. The high level method used was UB3LYP and the basis set LanL2DZ for Mo and D95V for C, N and H, and the UFF force field was used for the MM calculation. To check the formation of seven-coordinated complexes found by optimization of some  $[\text{Mo}(\text{CNH})_6(\text{CN})_2]^{2+}$  models, one of the Cu(CN)(CuCNL) and one CN- ligand were also included in the QM region, in order to describe properly the hydrogen bond formation, which is probably related to the decoordination process.

Full DFT optimization of the whole  $[\text{Mo}(\text{CN})_2(\text{CN-Cu}(\text{tris}(2\text{-aminoethyl})\text{amine})_6)]^{8+}$  molecule was attempted but SCF convergence problems forced us to abandon.

The optimization of the dimers in the quartet state was done with the BP86 functional and the same basis set for the two metals (LanL2DZ ECP for Mo and Cu) and SV basis set for N, C and H. The six possible dimers were optimized. The initial geometry was generated by superimposition of the optimized  $[\text{Cu}(\text{CNH})(\text{tris}(2\text{-aminoethyl})\text{amine})]^{2+}$  and  $[\text{Mo}(\text{CNH})_6(\text{CN})_2]^{2+}$  models in all the possible positions, as it is shown in Figure S1. All the possibilities were calculated and the results do not change substantially from one dimer to the other. For this reason, and to avoid reporting meaningless data, only results for one of the dimers are shown.

Finally, full optimization of whole the molecule for S=4 was carried out, in order to check the reliability of the ligand dissociation obtained in the model dimers and by ONIOM. The basis set used was the Ahlrichs double zeta plus polarization basis set<sup>2</sup> and the relativistic effects were introduced by the ZORA formalism<sup>5</sup>.

The ONIOM and the DFT geometry optimizations for the dimers were done with Gaussian03 suite of programs.<sup>6</sup> The DFT optimization of the whole molecule was one with ORCA.<sup>7</sup>

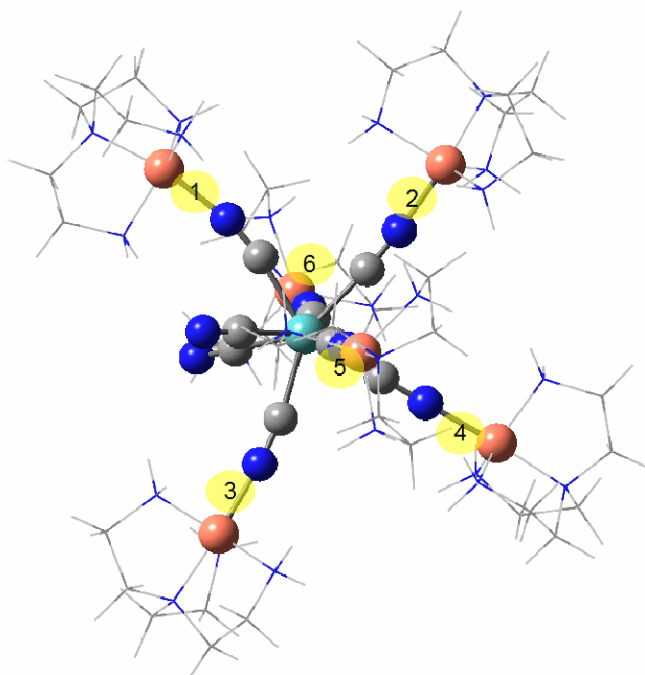

**Figure S1.** The six possible dimers on the initial structure.

To compute the energy of the excited states, accurate electronic structure calculations were performed using SA-CASSCF and CASPT2 techniques with the MOLCAS package.<sup>8</sup> A CAS(3,3) was used to have a general picture of the main states involved in the photomagnetic process and five states were averaged. In this way it is possible to map the energy of all the relevant states potentially involved in the process: from the ground state  $\text{Mo}^{\text{IV,CS}}$  till the charge transfer state. This CAS includes the  $d_{z^2}$  orbital of Cu, and the  $d_{z^2}$  and  $d_{xy}$  orbitals of Mo. However, consistency of these results were checked by using a larger CAS(11,12) including the 3d orbitals plus the polarization d shell for the Cu (so 10 orbitals to describe the Cu) and two d orbitals for Mo. To accelerate the CASPT2 calculations, Cu, Mo and first neighboring atoms (C and N) were selected for defining the correlation orbital space (active sites) in the CASPT2 calculation, and inactive orbitals with less than 0.1 of the density on the active sites were frozen, and no virtual orbitals were deleted.

The ANO-RCC basis set was used and the contraction applied is shown in Table S1.

**Table S1.** Basis set used in the CAS(3,3) calculations for the model dimers.

| Atom                    | Contraction              | reference |
|-------------------------|--------------------------|-----------|
| Mo                      | 21s18p13d6f4g2h/7s6p4d2f | 9         |
| Cu                      | 21s15p10d6f4g2h/6s5p3d2f | 9         |
| N coordinated to Cu     | 14s9p4d3f2g/4s3p1d       | 10        |
| N non coordinated to Cu | 14s9p4d3f2g/3s2p         | 10        |
| C coordinated to Mo     | 14s9p4d3f2g/4s3p1d       | 10        |
| C non coordinated to Mo | 14s9p4d3f2g/3s2p         | 10        |
| H                       | 8s4p3d1f/2s              | 11        |

However, to obtain an accurate value of the energetic splitting between the quartet and triplet state, which has a very small magnitude, it is necessary to improve the description of the electronic dynamic correlation. Since variational methods are not applicable at present to such a large system (even to the model dimers), an extended CASSCF-CASPT2 was used (3 electrons in 11 orbitals, including a double shell Mo d orbitals plus the Cu  $d_{z^2}$  singly occupied orbital), and a contraction which allows more flexibility to describe the Mo and Cu centers (shown in Table S2). Only one doublet and one quartet states were computed, to have the best orbitals for the states of interest.

**Table S2.** Basis set used to compute the doublet-quartet energy splitting for the seven-coordinated Mo complexes.

| Atom                    | Contraction                   | reference |
|-------------------------|-------------------------------|-----------|
| Mo                      | 21s18p13d6f4g2h/ 7s6p5d6f4g2h | 9         |
| Cu                      | 21s15p10d6f4g2h/ 6s5p4d6f4g2h | 9         |
| N coordinated to Cu     | 14s9p4d3f2g/4s3p1d            | 10        |
| N non coordinated to Cu | 14s9p4d3f2g/3s2p              | 10        |
| C coordinated to Mo     | 14s9p4d3f2g/4s3p1d            | 10        |
| C non coordinated to Mo | 14s9p4d3f2g/3s2p              | 10        |
| H                       | 8s4p3d1f/2s                   | 11        |

## References

1. A. Schaefer, C. Huber, and R. Ahlrichs, *J. Chem. Phys.*, **100** (1994) 5829-35.
2. A. Schaefer, H. Horn, and R. Ahlrichs, *J. Chem. Phys.*, **97** (1992) 2571-77.
3. T. H. Dunning Jr. and P. J. Hay, in *Modern Theoretical Chemistry*, Ed. H. F. Schaefer III, Vol. 3 (Plenum, New York, 1976) 1-28.
4. W. R. Wadt and P. J. Hay, *J. Chem. Phys.*, **82** (1985) 284-98.
5. S. Faas, J.G. Snijders, J.H. van Lenthe, E. van Lenthe, and E.J. Baerends, *Chem. Phys. Lett.* **246** (1995) 632.
6. Gaussian 03, Revision C.02, Frisch, M. J.; Trucks, G. W.; Schlegel, H. B.; Scuseria, G. E.; Robb, M. A.; Cheeseman, J. R.; Montgomery, Jr., J. A.; Vreven, T.; Kudin, K. N.; Burant, J. C.; Millam, J. M.; Iyengar, S. S.; Tomasi, J.; Barone, V.; Mennucci, B.; Cossi, M.; Scalmani, G.; Rega, N.; Petersson, G. A.; Nakatsuji, H.; Hada, M.; Ehara, M.; Toyota, K.; Fukuda, R.; Hasegawa, J.; Ishida, M.; Nakajima, T.; Honda, Y.; Kitao, O.; Nakai, H.; Klene, M.; Li, X.; Knox, J. E.; Hratchian, H. P.; Cross, J. B.; Bakken, V.; Adamo, C.; Jaramillo, J.; Gomperts, R.; Stratmann, R. E.; Yazyev, O.; Austin, A. J.; Cammi, R.; Pomelli, C.; Ochterski, J. W.; Ayala, P. Y.; Morokuma, K.; Voth, G. A.; Salvador, P.; Dannenberg, J. J.; Zakrzewski, V. G.; Dapprich, S.; Daniels, A. D.; Strain, M. C.; Farkas, O.; Malick, D. K.; Rabuck, A. D.; Raghavachari, K.; Foresman, J. B.; Ortiz, J. V.; Cui, Q.; Baboul, A. G.; Clifford, S.; Cioslowski, J.; Stefanov, B. B.; Liu, G.; Liashenko, A.; Piskorz, P.; Komaromi, I.; Martin, R. L.; Fox, D. J.; Keith, T.; Al-Laham, M. A.; Peng, C. Y.; Nanayakkara, A.; Challacombe, M.; Gill, P. M. W.; Johnson, B.; Chen, W.; Wong, M. W.; Gonzalez, C.; and Pople, J. A.; Gaussian, Inc., Wallingford CT, 2004.
7. ORCA, version 2.8; Neese, F., Institute for Physical and Theoretical Chemistry at the University of Bonn, Germany, 2008.
8. *MOLCAS* Version 7.2: Karlström, G.; Lindh, R.; Malmqvist, P.-Å.; Roos, B. O.; Ryde, U.; Veryazov, V.; Widmark, P.-O.; Cossi, M.; Schimmelpfennig, B.; Neogrady, P.; Seijo, L., *Computational Material Science*, **28**, 222 (2003)
9. Roos, B. O.; Lindh, R.; Malmqvist, P.-A.; Veryazov, V.; Widmark, P.-O., *J. Phys. Chem. A*, **109**, 6575-6579 (2005).
10. Roos, B. O.; Lindh, R.; Malmqvist, P.-Å.; Veryazov, V.; Widmark, P.-O., *J. Phys. Chem. A*, **108**, 2851, 2004
11. Widmark, P.-O.; Malmqvist, P.-A.; Roos, B. O., *Theor. Chim. Acta* **77**, 291 (1990)

## S2. Cartesian coordinates

A. Optimized  $[\text{Mo}(\text{CNH})_4(\text{CN})_2]^{2+}$  ( $\text{Mo}^{\text{IV}}$  closed shell)

|    |           |           |           |
|----|-----------|-----------|-----------|
| 42 | -1.686021 | 12.100284 | 15.166210 |
| 7  | -1.630327 | 12.327604 | 18.483374 |
| 7  | -3.371370 | 9.457334  | 16.344601 |
| 7  | -4.787977 | 13.261872 | 14.882596 |
| 7  | -2.602138 | 10.571707 | 12.330773 |
| 7  | -0.466675 | 13.917581 | 12.661560 |
| 7  | 0.701742  | 9.794397  | 14.988670 |
| 7  | 1.341981  | 13.193244 | 16.076123 |

|   |           |           |           |
|---|-----------|-----------|-----------|
| 7 | -2.016260 | 15.329673 | 15.974711 |
| 6 | -1.676086 | 12.205172 | 17.310843 |
| 6 | -1.895288 | 14.176797 | 15.687283 |
| 6 | -2.777877 | 10.387871 | 15.926901 |
| 6 | -3.679273 | 12.861618 | 14.988260 |
| 6 | -2.280415 | 11.108621 | 13.331161 |
| 6 | -0.918990 | 13.242336 | 13.516726 |
| 6 | -0.138021 | 10.625526 | 15.057281 |
| 6 | 0.259738  | 12.806274 | 15.751492 |
| 1 | 1.503702  | 9.160353  | 14.970704 |
| 1 | -5.703077 | 13.714700 | 14.827591 |
| 1 | -2.871044 | 10.122647 | 11.450398 |
| 1 | -3.881949 | 8.656983  | 16.728979 |
| 1 | -1.540487 | 12.511102 | 19.485911 |
| 1 | -0.042423 | 14.559555 | 11.987203 |

B. Optimized  $[\text{Mo}(\text{CNH})_4(\text{CN})_2]^{2+}$  ( $\text{Mo}^{\text{IV}}$  triplet)

|    |           |           |           |
|----|-----------|-----------|-----------|
| 42 | -1.658284 | 12.144425 | 15.183015 |
| 7  | -1.943625 | 13.504037 | 18.207420 |
| 7  | -2.549570 | 9.521867  | 17.216167 |
| 7  | -5.143978 | 12.161477 | 15.207453 |
| 7  | -2.676095 | 11.706703 | 11.930114 |
| 7  | 0.550387  | 13.868039 | 13.385568 |
| 7  | 0.093984  | 9.349728  | 14.056499 |
| 7  | 1.258886  | 11.959632 | 16.720312 |
| 7  | -2.765553 | 15.232362 | 14.799979 |
| 6  | -1.826572 | 12.984715 | 17.154016 |
| 6  | -2.365531 | 14.114299 | 14.983902 |
| 6  | -2.353250 | 10.442921 | 16.501386 |
| 6  | -3.969481 | 12.097738 | 15.086652 |
| 6  | -2.260985 | 11.765446 | 13.035558 |
| 6  | -0.264885 | 13.268944 | 13.993384 |
| 6  | -0.578659 | 10.217841 | 14.494664 |
| 6  | 0.217439  | 12.049319 | 16.127615 |
| 1  | 0.713204  | 8.611307  | 13.712062 |
| 1  | -6.157331 | 12.266242 | 15.304674 |
| 1  | -3.044419 | 11.676725 | 10.975543 |
| 1  | -2.698212 | 8.724981  | 17.841171 |
| 1  | -1.998742 | 13.997096 | 19.101855 |
| 1  | 1.262736  | 14.427407 | 12.910345 |

C. Optimized  $[\text{Mo}(\text{CNH})_4(\text{CN})_2]^{2+}$  ( $\text{Mo}^{\text{IV}}$  open shell singlet). It was obtained by optimizing first the triplet state and in a second step, the open shell singlet by reading the previously computed triplet orbitals and geometry.

|    |           |           |           |
|----|-----------|-----------|-----------|
| 42 | -1.720438 | 12.045556 | 15.144041 |
| 7  | -1.772467 | 14.011905 | 17.823733 |
| 7  | -2.446290 | 9.515344  | 17.184067 |
| 7  | -5.029288 | 11.893950 | 15.503201 |
| 7  | -2.744352 | 11.769412 | 11.987111 |
| 7  | 0.751093  | 13.956005 | 14.006776 |
| 7  | -0.082445 | 9.519176  | 13.718285 |
| 7  | 0.991823  | 11.349556 | 16.975947 |

|   |           |           |           |
|---|-----------|-----------|-----------|
| 7 | -3.039860 | 14.971765 | 14.199203 |
| 6 | -1.772482 | 13.299133 | 16.883901 |
| 6 | -2.575417 | 13.923720 | 14.531385 |
| 6 | -2.221096 | 10.406253 | 16.442294 |
| 6 | -3.856289 | 11.912027 | 15.369426 |
| 6 | -2.376431 | 11.829735 | 13.107661 |
| 6 | -0.125247 | 13.264442 | 14.387699 |
| 6 | -0.694172 | 10.400760 | 14.211001 |
| 6 | 0.022250  | 11.589357 | 16.322588 |
| 1 | 0.480810  | 8.754993  | 13.336608 |
| 1 | -6.047830 | 11.928243 | 15.594356 |
| 1 | -3.065716 | 11.770556 | 11.015775 |
| 1 | -2.597071 | 8.756819  | 17.853898 |
| 1 | -1.743266 | 14.647331 | 18.624425 |
| 1 | 1.505645  | 14.577213 | 13.705972 |

D. Optimized [Cu(CNH)(tris(2-aminoethyl)amine)]<sup>2+</sup>

|    |           |           |           |
|----|-----------|-----------|-----------|
| 6  | 3.820679  | -0.002960 | 0.000226  |
| 7  | 2.643963  | -0.002588 | 0.000030  |
| 29 | 0.658325  | -0.000176 | 0.001120  |
| 7  | -1.427189 | 0.002976  | -0.002735 |
| 6  | -1.861224 | 1.276962  | -0.708064 |
| 6  | -0.925152 | 2.437284  | -0.359228 |
| 7  | 0.494590  | 2.004460  | -0.620837 |
| 7  | 0.484422  | -0.465994 | 2.047665  |
| 6  | -0.937007 | -0.905480 | 2.286446  |
| 6  | -1.868412 | -0.022387 | 1.451473  |
| 7  | 0.485988  | -1.548379 | -1.419892 |
| 6  | -0.932436 | -1.529280 | -1.928670 |
| 6  | -1.868352 | -1.242561 | -0.751770 |
| 1  | 1.158215  | -1.199496 | 2.340542  |
| 1  | 0.714366  | 0.380137  | 2.607343  |
| 1  | 1.165200  | -1.443752 | -2.198020 |
| 1  | 0.706586  | -2.455136 | -0.960544 |
| 1  | 1.172095  | 2.622881  | -0.134666 |
| 1  | 0.721876  | 2.062719  | -1.634194 |
| 1  | -1.219761 | -0.847784 | 3.363002  |
| 1  | -1.017072 | -1.976150 | 1.995877  |
| 1  | -2.925349 | -0.374637 | 1.517738  |
| 1  | -1.852479 | 1.022847  | 1.833436  |
| 1  | -1.216663 | -2.489468 | -2.417968 |
| 1  | -1.004386 | -0.742010 | -2.711427 |
| 1  | -2.923680 | -1.121853 | -1.094555 |
| 1  | -1.856800 | -2.093913 | -0.035228 |
| 1  | -1.004530 | 2.719999  | 0.714001  |
| 1  | -1.203669 | 3.342960  | -0.946236 |
| 1  | -2.918043 | 1.515802  | -0.439297 |
| 1  | -1.844216 | 1.083103  | -1.804302 |
| 1  | 4.915887  | -0.003927 | -0.000091 |

E. Optimized [Cu(CNH)(tris(2-aminoethyl)amine)]<sup>1+</sup>

|   |           |          |           |
|---|-----------|----------|-----------|
| 6 | -4.040661 | 0.002963 | -0.002205 |
|---|-----------|----------|-----------|

|    |           |           |           |
|----|-----------|-----------|-----------|
| 7  | -2.850032 | 0.001573  | -0.000274 |
| 29 | -0.975225 | 0.002083  | -0.001052 |
| 7  | 1.835428  | 0.002549  | -0.002858 |
| 6  | 2.081976  | -0.960971 | -1.087717 |
| 6  | 0.962621  | -2.010223 | -1.248346 |
| 7  | -0.367897 | -1.369832 | -1.493648 |
| 7  | -0.362650 | -0.629129 | 1.924285  |
| 6  | 0.960573  | -0.082642 | 2.361903  |
| 6  | 2.085841  | -0.453744 | 1.373877  |
| 7  | -0.365493 | 1.981531  | -0.418118 |
| 6  | 0.957024  | 2.091689  | -1.110631 |
| 6  | 2.083605  | 1.423306  | -0.296295 |
| 1  | -1.113579 | -0.330138 | 2.573417  |
| 1  | -0.349301 | -1.667411 | 1.938969  |
| 1  | -1.117640 | 2.393565  | -1.000600 |
| 1  | -0.353074 | 2.511880  | 0.474757  |
| 1  | -1.115130 | -2.087072 | -1.534850 |
| 1  | -0.372692 | -0.878669 | -2.408549 |
| 1  | 1.247407  | -0.443185 | 3.381231  |
| 1  | 0.858488  | 1.024748  | 2.431237  |
| 1  | 3.053137  | -0.056274 | 1.783729  |
| 1  | 2.199489  | -1.563721 | 1.357874  |
| 1  | 1.241228  | 3.155743  | -1.305883 |
| 1  | 0.855367  | 1.599664  | -2.105101 |
| 1  | 3.050548  | 1.580789  | -0.846037 |
| 1  | 2.197415  | 1.964475  | 0.673152  |
| 1  | 0.873814  | -2.621473 | -0.321109 |
| 1  | 1.248033  | -2.713295 | -2.070201 |
| 1  | 3.054468  | -1.508133 | -0.957631 |
| 1  | 2.181771  | -0.391932 | -2.042466 |
| 1  | -5.129607 | 0.000922  | -0.000663 |

F. ONIOM optimized structure for the  $[\text{Mo}(\text{CuNL})_4(\text{CN})_2]^{8+}$  ( $\text{Mo}^{\text{IV}}$  closed shell singlet)

|    |          |           |          |           |
|----|----------|-----------|----------|-----------|
| 42 | 10421006 | 8.661369  | 4.542385 | 14.502682 |
| 29 | 10291003 | 7.296955  | 7.012417 | 10.054323 |
| 29 | 10291003 | 10.279138 | 0.511650 | 11.512429 |
| 29 | 10291003 | 12.943873 | 7.003204 | 12.587515 |
| 29 | 10291003 | 12.602846 | 2.476219 | 17.389465 |
| 29 | 10291003 | 9.419940  | 8.506375 | 17.892823 |
| 29 | 10291003 | 5.982437  | 2.031311 | 18.279192 |
| 7  | 10071001 | 7.842029  | 6.124668 | 11.702054 |
| 7  | 10071001 | 9.726123  | 2.002290 | 12.638864 |
| 7  | 10071001 | 11.405892 | 6.035978 | 13.294237 |
| 7  | 10071001 | 11.115206 | 3.228821 | 16.377480 |
| 7  | 10071001 | 9.161015  | 7.051256 | 16.623393 |
| 7  | 10071001 | 7.076574  | 2.921185 | 16.931904 |
| 7  | 10071001 | 5.890237  | 6.287980 | 15.109244 |
| 7  | 10071001 | 6.171022  | 2.788306 | 13.155669 |
| 7  | 10071003 | 6.762221  | 7.924818 | 8.389512  |
| 7  | 10071003 | 6.102842  | 8.225615 | 11.043565 |
| 1  | 10011000 | 5.568355  | 7.708637 | 11.778879 |
| 1  | 10011000 | 6.667353  | 8.987375 | 11.485293 |

|   |          |           |           |           |
|---|----------|-----------|-----------|-----------|
| 7 | 10071003 | 6.589750  | 5.334021  | 9.307830  |
| 1 | 10011000 | 7.231141  | 4.533226  | 9.510661  |
| 1 | 10011000 | 5.644010  | 5.142635  | 9.711539  |
| 7 | 10071003 | 9.157360  | 7.540855  | 9.680989  |
| 1 | 10011000 | 9.641021  | 7.860499  | 10.551180 |
| 1 | 10011000 | 9.671481  | 6.729893  | 9.266459  |
| 7 | 10071003 | 9.392123  | 1.299641  | 9.941130  |
| 1 | 10011000 | 8.365925  | 1.101540  | 9.983018  |
| 1 | 10011000 | 9.552015  | 2.332252  | 9.897551  |
| 7 | 10071003 | 9.309648  | -0.776712 | 12.641646 |
| 1 | 10011000 | 8.371382  | -0.404456 | 12.914954 |
| 7 | 10071003 | 14.487275 | 8.001170  | 11.872346 |
| 7 | 10071003 | 12.062947 | 8.728603  | 12.942278 |
| 1 | 10011000 | 11.370538 | 8.930655  | 12.184897 |
| 1 | 10011000 | 11.580227 | 8.719401  | 13.869464 |
| 7 | 10071003 | 12.749300 | 6.138908  | 10.830106 |
| 1 | 10011000 | 13.174558 | 5.183752  | 10.860864 |
| 1 | 10011000 | 11.743598 | 6.069664  | 10.553988 |
| 7 | 10071003 | 14.139147 | 6.210498  | 13.935468 |
| 1 | 10011000 | 14.020068 | 6.710833  | 14.846311 |
| 1 | 10011000 | 13.940070 | 5.191480  | 14.060619 |
| 7 | 10071003 | 14.125154 | 1.716616  | 18.385794 |
| 7 | 10071003 | 13.037560 | 1.257887  | 15.903869 |
| 1 | 10011000 | 12.170490 | 0.837141  | 15.497801 |
| 1 | 10011000 | 13.556867 | 1.783430  | 15.163376 |
| 7 | 10071003 | 11.411791 | 1.877930  | 18.836526 |
| 1 | 10011000 | 10.707299 | 2.615396  | 19.067018 |
| 1 | 10011000 | 10.926175 | 0.997112  | 18.549446 |
| 7 | 10071003 | 13.469371 | 4.240372  | 17.511007 |
| 1 | 10011000 | 13.391730 | 4.760908  | 16.607708 |
| 1 | 10011000 | 13.025364 | 4.795174  | 18.278570 |
| 7 | 10071003 | 9.689278  | 9.973186  | 19.183141 |
| 7 | 10071003 | 10.094186 | 9.695574  | 16.475995 |
| 1 | 10011000 | 11.093736 | 9.463133  | 16.273718 |
| 1 | 10011000 | 9.524358  | 9.603664  | 15.603993 |
| 7 | 10071003 | 10.683705 | 7.419975  | 18.942357 |
| 1 | 10011000 | 10.152508 | 6.751426  | 19.546467 |
| 1 | 10011000 | 11.333517 | 6.891513  | 18.316150 |
| 7 | 10071003 | 7.506803  | 8.513834  | 18.357664 |
| 1 | 10011000 | 6.970555  | 9.027480  | 17.621015 |
| 1 | 10011000 | 7.138676  | 7.539247  | 18.449692 |
| 7 | 10071003 | 4.879451  | 1.129298  | 19.642564 |
| 7 | 10071003 | 5.502577  | 3.754647  | 19.102044 |
| 1 | 10011000 | 6.291268  | 4.085570  | 19.704177 |
| 1 | 10011000 | 5.289042  | 4.472588  | 18.372210 |
| 7 | 10071003 | 7.537569  | 1.024576  | 18.945657 |
| 1 | 10011000 | 7.731228  | 0.217148  | 18.309577 |
| 1 | 10011000 | 8.380514  | 1.639433  | 19.005386 |
| 7 | 10071003 | 4.822850  | 1.247595  | 16.894291 |
| 1 | 10011000 | 4.139491  | 1.966928  | 16.563121 |
| 1 | 10011000 | 5.387342  | 0.896931  | 16.086848 |
| 6 | 10061001 | 8.150590  | 5.579178  | 12.691326 |

|   |          |           |           |           |
|---|----------|-----------|-----------|-----------|
| 6 | 10061001 | 9.350724  | 2.895363  | 13.301373 |
| 6 | 10061001 | 10.458624 | 5.488066  | 13.713774 |
| 6 | 10061001 | 10.240511 | 3.683110  | 15.744270 |
| 6 | 10061001 | 8.964949  | 6.177282  | 15.864800 |
| 6 | 10061001 | 7.681124  | 3.472137  | 16.093839 |
| 6 | 10061001 | 6.867817  | 5.653953  | 14.885734 |
| 6 | 10061001 | 7.045325  | 3.427298  | 13.640090 |
| 6 | 10061003 | 5.182025  | 8.792201  | 10.067224 |
| 1 | 10011000 | 4.366438  | 8.066038  | 9.860703  |
| 1 | 10011000 | 4.721887  | 9.722694  | 10.467182 |
| 6 | 10061003 | 5.941155  | 9.094853  | 8.776663  |
| 1 | 10011000 | 5.229305  | 9.378311  | 7.968618  |
| 1 | 10011000 | 6.577255  | 9.986504  | 8.972443  |
| 6 | 10061003 | 6.484710  | 5.533242  | 7.868328  |
| 1 | 10011000 | 5.786814  | 4.787965  | 7.426771  |
| 1 | 10011000 | 7.482474  | 5.390518  | 7.399890  |
| 6 | 10061003 | 5.983957  | 6.950147  | 7.590870  |
| 1 | 10011000 | 4.905494  | 6.975454  | 7.863156  |
| 1 | 10011000 | 6.045850  | 7.174005  | 6.501770  |
| 6 | 10061003 | 9.097301  | 8.631509  | 8.718103  |
| 1 | 10011000 | 10.078980 | 8.748321  | 8.207811  |
| 1 | 10011000 | 8.868220  | 9.581828  | 9.246957  |
| 6 | 10061003 | 8.003897  | 8.334713  | 7.693992  |
| 1 | 10011000 | 8.383875  | 7.522706  | 7.035007  |
| 1 | 10011000 | 7.833308  | 9.222990  | 7.044395  |
| 6 | 10061003 | 9.974723  | 0.657879  | 8.770240  |
| 1 | 10011000 | 9.306102  | 0.783565  | 7.890091  |
| 1 | 10011000 | 10.950329 | 1.134273  | 8.532571  |
| 6 | 10061003 | 10.184725 | -0.826978 | 9.062577  |
| 1 | 10011000 | 9.180825  | -1.306619 | 9.058932  |
| 6 | 10061003 | 13.110252 | 9.740264  | 12.938961 |
| 1 | 10011000 | 13.636037 | 9.733913  | 13.918185 |
| 1 | 10011000 | 12.668871 | 10.750569 | 12.790661 |
| 6 | 10061003 | 14.101019 | 9.429887  | 11.819243 |
| 1 | 10011000 | 14.990169 | 10.095904 | 11.895889 |
| 1 | 10011000 | 13.596539 | 9.675684  | 10.858334 |
| 6 | 10061003 | 13.469985 | 6.973625  | 9.878864  |
| 1 | 10011000 | 12.839782 | 7.845397  | 9.598730  |
| 1 | 10011000 | 13.693738 | 6.397584  | 8.953950  |
| 6 | 10061003 | 14.767755 | 7.460217  | 10.522371 |
| 1 | 10011000 | 15.258719 | 8.219551  | 9.872510  |
| 1 | 10011000 | 15.455873 | 6.587327  | 10.572960 |
| 6 | 10061003 | 15.497661 | 6.392971  | 13.442170 |
| 1 | 10011000 | 15.727579 | 5.609007  | 12.688569 |
| 1 | 10011000 | 16.226230 | 6.293278  | 14.276941 |
| 6 | 10061003 | 15.619311 | 7.774571  | 12.800345 |
| 1 | 10011000 | 16.598765 | 7.872225  | 12.279608 |
| 1 | 10011000 | 15.618731 | 8.520090  | 13.626280 |
| 6 | 10061003 | 14.857588 | 0.825008  | 17.457611 |
| 1 | 10011000 | 15.617786 | 1.389038  | 16.872819 |
| 6 | 10061003 | 12.259852 | 1.624399  | 19.993917 |
| 1 | 10011000 | 11.734134 | 0.963418  | 20.718012 |



|   |          |           |           |           |
|---|----------|-----------|-----------|-----------|
| 1 | 10011000 | 12.485918 | 2.584489  | 20.506138 |
| 6 | 10061003 | 13.561326 | 0.968495  | 19.533036 |
| 1 | 10011000 | 13.317150 | -0.079339 | 19.249925 |
| 1 | 10011000 | 14.284571 | 0.913163  | 20.377917 |
| 6 | 10061003 | 14.870544 | 3.994972  | 17.823265 |
| 1 | 10011000 | 15.338070 | 4.913799  | 18.241209 |
| 1 | 10011000 | 15.416006 | 3.722981  | 16.893769 |
| 6 | 10061003 | 14.966318 | 2.851207  | 18.831478 |
| 1 | 10011000 | 16.028223 | 2.543734  | 18.965198 |
| 1 | 10011000 | 14.620915 | 3.248626  | 19.811622 |
| 6 | 10061003 | 9.997197  | 11.054330 | 16.991869 |
| 1 | 10011000 | 8.953097  | 11.419413 | 16.883092 |
| 1 | 10011000 | 10.662136 | 11.733454 | 16.413710 |
| 6 | 10061003 | 10.394231 | 11.061231 | 18.467085 |
| 1 | 10011000 | 11.497473 | 10.923453 | 18.509796 |
| 1 | 10011000 | 10.176393 | 12.055075 | 18.919773 |
| 6 | 10061003 | 11.440973 | 8.346371  | 19.773018 |
| 1 | 10011000 | 12.251542 | 8.808881  | 19.169497 |
| 1 | 10011000 | 11.910816 | 7.804600  | 20.623468 |
| 6 | 10061003 | 10.503678 | 9.433264  | 20.295939 |
| 1 | 10011000 | 9.861886  | 8.965304  | 21.075045 |
| 1 | 10011000 | 11.088151 | 10.235998 | 20.799918 |
| 6 | 10061003 | 7.391381  | 9.209742  | 19.632332 |
| 1 | 10011000 | 6.346213  | 9.557655  | 19.787411 |
| 1 | 10011000 | 7.649207  | 8.514205  | 20.460030 |
| 6 | 10061003 | 8.348281  | 10.400690 | 19.643752 |
| 1 | 10011000 | 7.917609  | 11.173347 | 18.968892 |
| 1 | 10011000 | 8.391247  | 10.850335 | 20.661624 |
| 6 | 10061003 | 4.321483  | 3.511969  | 19.919683 |
| 1 | 10011000 | 3.417209  | 3.506548  | 19.273652 |
| 1 | 10011000 | 4.201943  | 4.321936  | 20.672797 |
| 6 | 10061003 | 4.462519  | 2.161246  | 20.619455 |
| 1 | 10011000 | 3.506986  | 1.885510  | 21.120383 |
| 1 | 10011000 | 5.222149  | 2.286260  | 21.422665 |
| 6 | 10061003 | 7.185349  | 0.538808  | 20.272972 |
| 1 | 10011000 | 7.327007  | 1.352736  | 21.016488 |
| 1 | 10011000 | 7.846299  | -0.308670 | 20.560200 |
| 6 | 10061003 | 5.725393  | 0.089734  | 20.272586 |
| 1 | 10011000 | 5.677205  | -0.866891 | 19.706536 |
| 1 | 10011000 | 5.390959  | -0.133575 | 21.311041 |
| 6 | 10061003 | 3.716613  | 0.537422  | 18.942168 |
| 1 | 10011000 | 2.882323  | 1.268547  | 18.856896 |
| 6 | 10061003 | 4.113498  | 0.140376  | 17.521428 |
| 1 | 10011000 | 4.773204  | -0.753526 | 17.552609 |
| 1 | 10011000 | 3.207841  | -0.120352 | 16.930385 |
| 1 | 10011000 | 3.316327  | -0.345044 | 19.490904 |
| 1 | 10011000 | 15.402629 | 0.024281  | 18.006980 |
| 6 | 10061003 | 13.884999 | 0.209068  | 16.454201 |
| 1 | 10011000 | 14.446516 | -0.298803 | 15.639052 |
| 1 | 10011000 | 13.253159 | -0.551083 | 16.962303 |
| 1 | 10011000 | 9.873158  | -0.982944 | 13.498434 |
| 1 | 10011000 | 10.770836 | -1.301477 | 8.243211  |

|   |          |           |           |           |
|---|----------|-----------|-----------|-----------|
| 7 | 10071003 | 12.177457 | 0.898681  | 11.866955 |
| 1 | 10011000 | 12.331173 | 1.132902  | 12.874122 |
| 1 | 10011000 | 12.489360 | 1.696526  | 11.266656 |
| 7 | 10071003 | 10.853796 | -0.992238 | 10.373471 |
| 6 | 10061003 | 12.327314 | -0.911129 | 10.249893 |
| 1 | 10011000 | 12.775774 | -1.911608 | 10.054931 |
| 1 | 10011000 | 12.625203 | -0.254382 | 9.402565  |
| 6 | 10061003 | 10.429893 | -2.239051 | 11.050976 |
| 1 | 10011000 | 10.273180 | -3.065915 | 10.321723 |
| 1 | 10011000 | 11.201733 | -2.588488 | 11.772136 |
| 6 | 10061003 | 9.150824  | -1.988063 | 11.847953 |
| 1 | 10011000 | 8.936348  | -2.856169 | 12.509672 |
| 1 | 10011000 | 8.293506  | -1.866000 | 11.151271 |
| 6 | 10061003 | 12.921165 | -0.304333 | 11.519502 |
| 1 | 10011000 | 13.994925 | -0.060529 | 11.361077 |
| 1 | 10011000 | 12.853578 | -1.036587 | 12.352980 |

G. ONIOM optimized structure for the  $[\text{Mo}(\text{CuNL})_6(\text{CN})_2]^{8+}$  ( $\text{Mo}^{\text{IV}}$  triplet)

|    |          |           |           |           |
|----|----------|-----------|-----------|-----------|
| 42 | 10421006 | 8.883384  | 4.546790  | 14.487136 |
| 29 | 10291003 | 6.650892  | 7.161816  | 10.395930 |
| 29 | 10291003 | 11.360469 | 0.340169  | 12.382493 |
| 29 | 10291003 | 12.473669 | 7.025520  | 11.463532 |
| 29 | 10291003 | 11.503927 | 2.248250  | 18.532856 |
| 29 | 10291003 | 10.557749 | 8.255300  | 17.904045 |
| 29 | 10291003 | 4.598776  | 2.510655  | 16.857571 |
| 7  | 10071001 | 7.470276  | 6.213855  | 11.862677 |
| 7  | 10071001 | 10.430602 | 1.851885  | 13.135008 |
| 7  | 10071001 | 11.122533 | 6.134139  | 12.514521 |
| 7  | 10071001 | 10.570158 | 3.042856  | 17.044826 |
| 7  | 10071001 | 9.900409  | 6.937844  | 16.659315 |
| 7  | 10071001 | 6.132330  | 3.257408  | 15.960053 |
| 7  | 10071001 | 6.649950  | 6.485114  | 16.076815 |
| 7  | 10071001 | 7.112659  | 2.073671  | 13.064442 |
| 7  | 10071003 | 5.858386  | 8.150656  | 8.881888  |
| 7  | 10071003 | 7.260934  | 8.888234  | 11.125706 |
| 1  | 10011000 | 7.118655  | 8.928725  | 12.160920 |
| 1  | 10011000 | 8.272209  | 9.029662  | 10.902909 |
| 7  | 10071003 | 4.855877  | 6.497682  | 10.849287 |
| 1  | 10011000 | 4.885038  | 5.486584  | 11.114490 |
| 1  | 10011000 | 4.461528  | 7.061594  | 11.637011 |
| 7  | 10071003 | 7.742991  | 6.165677  | 9.095112  |
| 1  | 10011000 | 8.715920  | 6.021063  | 9.446000  |
| 1  | 10011000 | 7.297508  | 5.238625  | 8.904747  |
| 7  | 10071003 | 12.713806 | 1.515049  | 11.566449 |
| 1  | 10011000 | 12.327422 | 1.938757  | 10.691652 |
| 1  | 10011000 | 13.001657 | 2.270189  | 12.230044 |
| 7  | 10071003 | 9.770611  | -0.194206 | 11.351197 |
| 1  | 10011000 | 9.304280  | 0.637762  | 10.922311 |
| 7  | 10071003 | 13.863599 | 7.963175  | 10.423106 |
| 7  | 10071003 | 11.178288 | 7.494936  | 10.060208 |
| 1  | 10011000 | 11.040771 | 6.672665  | 9.429048  |
| 1  | 10011000 | 10.264726 | 7.786421  | 10.474204 |

|   |          |           |           |           |
|---|----------|-----------|-----------|-----------|
| 7 | 10071003 | 13.522361 | 5.369680  | 11.286373 |
| 1 | 10011000 | 14.049909 | 5.190927  | 12.171672 |
| 1 | 10011000 | 12.899998 | 4.557419  | 11.072573 |
| 7 | 10071003 | 12.833398 | 8.269519  | 12.948853 |
| 1 | 10011000 | 12.097598 | 9.012719  | 12.969144 |
| 1 | 10011000 | 12.850397 | 7.762237  | 13.862948 |
| 7 | 10071003 | 12.450858 | 1.471936  | 20.080478 |
| 7 | 10071003 | 11.227935 | 0.426562  | 17.843375 |
| 1 | 10011000 | 10.264196 | 0.311003  | 17.454351 |
| 1 | 10011000 | 11.938629 | 0.223590  | 17.103953 |
| 7 | 10071003 | 10.203748 | 3.023933  | 19.793780 |
| 1 | 10011000 | 9.945551  | 3.998985  | 19.519694 |
| 1 | 10011000 | 9.345231  | 2.426811  | 19.820854 |
| 7 | 10071003 | 13.156153 | 3.218759  | 18.076833 |
| 1 | 10011000 | 13.331099 | 3.197691  | 17.046062 |
| 1 | 10011000 | 13.083961 | 4.209318  | 18.403666 |
| 7 | 10071003 | 11.268515 | 9.579629  | 19.180790 |
| 7 | 10071003 | 11.894372 | 8.877113  | 16.597889 |
| 1 | 10011000 | 12.694262 | 8.203757  | 16.567779 |
| 1 | 10011000 | 11.469846 | 8.967324  | 15.646674 |
| 7 | 10071003 | 11.009608 | 6.845541  | 19.203476 |
| 1 | 10011000 | 10.146669 | 6.560138  | 19.720999 |
| 1 | 10011000 | 11.427322 | 6.014841  | 18.726159 |
| 7 | 10071003 | 8.809514  | 9.151577  | 18.009424 |
| 1 | 10011000 | 8.679731  | 9.764831  | 17.172120 |
| 1 | 10011000 | 8.032581  | 8.453802  | 18.063194 |
| 7 | 10071003 | 3.033456  | 1.751657  | 17.786296 |
| 7 | 10071003 | 3.667485  | 4.245172  | 16.812888 |
| 1 | 10011000 | 4.041556  | 4.861372  | 17.570833 |
| 1 | 10011000 | 3.788119  | 4.712225  | 15.885020 |
| 7 | 10071003 | 5.696638  | 2.021604  | 18.418275 |
| 1 | 10011000 | 6.222732  | 1.141204  | 18.212715 |
| 1 | 10011000 | 6.367909  | 2.786091  | 18.660664 |
| 7 | 10071003 | 4.313428  | 1.205250  | 15.411644 |
| 1 | 10011000 | 3.834277  | 1.673072  | 14.608144 |
| 1 | 10011000 | 5.220566  | 0.794063  | 15.093098 |
| 6 | 10061001 | 7.958921  | 5.649075  | 12.746064 |
| 6 | 10061001 | 9.880130  | 2.762869  | 13.591137 |
| 6 | 10061001 | 10.337972 | 5.596705  | 13.173512 |
| 6 | 10061001 | 10.002552 | 3.542463  | 16.170197 |
| 6 | 10061001 | 9.526118  | 6.131250  | 15.917391 |
| 6 | 10061001 | 7.064013  | 3.708204  | 15.434434 |
| 6 | 10061001 | 7.425771  | 5.804957  | 15.542407 |
| 6 | 10061001 | 7.727799  | 2.918692  | 13.572044 |
| 6 | 10061003 | 6.465989  | 9.921802  | 10.477495 |
| 1 | 10011000 | 5.472740  | 9.991588  | 10.971213 |
| 1 | 10011000 | 6.968432  | 10.909883 | 10.571676 |
| 6 | 10061003 | 6.286346  | 9.562762  | 9.005006  |
| 1 | 10011000 | 5.555971  | 10.253471 | 8.525923  |
| 1 | 10011000 | 7.266226  | 9.731738  | 8.505172  |
| 6 | 10061003 | 4.041454  | 6.674720  | 9.653860  |
| 1 | 10011000 | 2.961009  | 6.646525  | 9.917035  |

|   |          |           |           |           |
|---|----------|-----------|-----------|-----------|
| 1 | 10011000 | 4.244715  | 5.846924  | 8.940543  |
| 6 | 10061003 | 4.388061  | 8.012284  | 8.999529  |
| 1 | 10011000 | 3.957442  | 8.811996  | 9.642028  |
| 1 | 10011000 | 3.889959  | 8.095701  | 8.007064  |
| 6 | 10061003 | 7.764034  | 6.963340  | 7.877814  |
| 1 | 10011000 | 8.078293  | 6.338208  | 7.013074  |
| 1 | 10011000 | 8.495550  | 7.792714  | 7.990499  |
| 6 | 10061003 | 6.368765  | 7.533849  | 7.635804  |
| 1 | 10011000 | 5.721336  | 6.689934  | 7.308646  |
| 1 | 10011000 | 6.391741  | 8.265537  | 6.796625  |
| 6 | 10061003 | 13.860427 | 0.675196  | 11.247056 |
| 1 | 10011000 | 14.499951 | 1.171736  | 10.484068 |
| 1 | 10011000 | 14.473382 | 0.519740  | 12.161048 |
| 6 | 10061003 | 13.367016 | -0.672120 | 10.722743 |
| 1 | 10011000 | 12.973222 | -0.499785 | 9.696578  |
| 6 | 10061003 | 11.761221 | 8.598382  | 9.310077  |
| 1 | 10011000 | 11.608174 | 9.547812  | 9.867192  |
| 1 | 10011000 | 11.264027 | 8.694782  | 8.319520  |
| 6 | 10061003 | 13.256282 | 8.342818  | 9.126399  |
| 1 | 10011000 | 13.749985 | 9.241330  | 8.691645  |
| 1 | 10011000 | 13.359670 | 7.526232  | 8.377792  |
| 6 | 10061003 | 14.453271 | 5.582437  | 10.185936 |
| 1 | 10011000 | 13.929797 | 5.417707  | 9.219428  |
| 1 | 10011000 | 15.295017 | 4.857824  | 10.249113 |
| 6 | 10061003 | 14.986257 | 7.013627  | 10.245081 |
| 1 | 10011000 | 15.572836 | 7.244160  | 9.327048  |
| 1 | 10011000 | 15.695552 | 7.063502  | 11.100752 |
| 6 | 10061003 | 14.136556 | 8.867545  | 12.694974 |
| 1 | 10011000 | 14.936708 | 8.166585  | 13.017007 |
| 1 | 10011000 | 14.247891 | 9.808757  | 13.277658 |
| 6 | 10061003 | 14.272699 | 9.154097  | 11.202177 |
| 1 | 10011000 | 15.316273 | 9.459636  | 10.962053 |
| 1 | 10011000 | 13.621112 | 10.027253 | 10.975813 |
| 6 | 10061003 | 12.595724 | 0.021574  | 19.815952 |
| 1 | 10011000 | 13.523945 | -0.193083 | 19.241307 |
| 6 | 10061003 | 10.844408 | 3.030521  | 21.101005 |
| 1 | 10011000 | 10.080940 | 3.134452  | 21.903342 |
| 1 | 10011000 | 11.538531 | 3.896080  | 21.169806 |
| 6 | 10061003 | 11.621783 | 1.728985  | 21.280280 |
| 1 | 10011000 | 10.874332 | 0.919255  | 21.435026 |
| 1 | 10011000 | 12.242596 | 1.774927  | 22.203617 |
| 6 | 10061003 | 14.241757 | 2.546007  | 18.776978 |
| 1 | 10011000 | 15.125479 | 3.217519  | 18.852416 |
| 1 | 10011000 | 14.544904 | 1.639810  | 18.209411 |
| 6 | 10061003 | 13.766407 | 2.145662  | 20.171909 |
| 1 | 10011000 | 14.523881 | 1.495440  | 20.665317 |
| 1 | 10011000 | 13.700385 | 3.078351  | 20.775235 |
| 6 | 10061003 | 12.358319 | 10.179674 | 17.055781 |
| 1 | 10011000 | 11.629421 | 10.961896 | 16.752376 |
| 1 | 10011000 | 13.338664 | 10.424058 | 16.589995 |
| 6 | 10061003 | 12.489834 | 10.160015 | 18.577188 |
| 1 | 10011000 | 13.388039 | 9.549958  | 18.820139 |

|   |          |           |           |           |
|---|----------|-----------|-----------|-----------|
| 1 | 10011000 | 12.684521 | 11.187354 | 18.960219 |
| 6 | 10061003 | 11.974122 | 7.421163  | 20.129849 |
| 1 | 10011000 | 12.985932 | 7.405310  | 19.670233 |
| 1 | 10011000 | 12.011481 | 6.822822  | 21.067059 |
| 6 | 10061003 | 11.570487 | 8.860796  | 20.439959 |
| 1 | 10011000 | 10.677804 | 8.815377  | 21.102561 |
| 1 | 10011000 | 12.374580 | 9.370253  | 21.017852 |
| 6 | 10061003 | 8.833978  | 9.961917  | 19.220444 |
| 1 | 10011000 | 8.050832  | 10.750419 | 19.171289 |
| 1 | 10011000 | 8.620219  | 9.319181  | 20.101610 |
| 6 | 10061003 | 10.213999 | 10.601776 | 19.373498 |
| 1 | 10011000 | 10.288135 | 11.406719 | 18.609160 |
| 1 | 10011000 | 10.301418 | 11.094520 | 20.368291 |
| 6 | 10061003 | 2.256713  | 3.968838  | 17.048746 |
| 1 | 10011000 | 1.781358  | 3.629410  | 16.103218 |
| 1 | 10011000 | 1.734749  | 4.892069  | 17.384473 |
| 6 | 10061003 | 2.128454  | 2.878060  | 18.110385 |
| 1 | 10011000 | 1.070219  | 2.540528  | 18.189725 |
| 1 | 10011000 | 2.393029  | 3.339417  | 19.087625 |
| 6 | 10061003 | 4.775723  | 1.802185  | 19.525387 |
| 1 | 10011000 | 4.486012  | 2.780003  | 19.967137 |
| 1 | 10011000 | 5.266231  | 1.197106  | 20.319635 |
| 6 | 10061003 | 3.531925  | 1.081433  | 19.009122 |
| 1 | 10011000 | 3.826138  | 0.028900  | 18.800630 |
| 1 | 10011000 | 2.750537  | 1.046172  | 19.801756 |
| 6 | 10061003 | 2.398424  | 0.790294  | 16.855900 |
| 1 | 10011000 | 1.665897  | 1.297669  | 16.189737 |
| 6 | 10061003 | 3.460238  | 0.158013  | 15.957631 |
| 1 | 10011000 | 4.076651  | -0.552524 | 16.549591 |
| 1 | 10011000 | 2.974584  | -0.410783 | 15.134154 |
| 1 | 10011000 | 1.839210  | -0.000139 | 17.405971 |
| 1 | 10011000 | 12.662511 | -0.561009 | 20.762614 |
| 6 | 10061003 | 11.420549 | -0.473062 | 18.972920 |
| 1 | 10011000 | 11.617325 | -1.506708 | 18.611755 |
| 1 | 10011000 | 10.498159 | -0.493373 | 19.592636 |
| 1 | 10011000 | 9.098743  | -0.692451 | 11.979236 |
| 1 | 10011000 | 14.218898 | -1.382661 | 10.625363 |
| 7 | 10071003 | 11.671905 | -0.417255 | 14.172684 |
| 1 | 10011000 | 10.818025 | -0.331148 | 14.770167 |
| 1 | 10011000 | 12.473960 | 0.079705  | 14.624006 |
| 7 | 10071003 | 12.315596 | -1.206498 | 11.618386 |
| 6 | 10061003 | 12.895070 | -1.966048 | 12.750000 |
| 1 | 10011000 | 13.027347 | -3.041589 | 12.493554 |
| 1 | 10011000 | 13.899661 | -1.575240 | 13.025471 |
| 6 | 10061003 | 11.319347 | -2.010052 | 10.873542 |
| 1 | 10011000 | 11.797367 | -2.594959 | 10.055347 |
| 1 | 10011000 | 10.813476 | -2.743442 | 11.539916 |
| 6 | 10061003 | 10.234949 | -1.096091 | 10.305439 |
| 1 | 10011000 | 9.387769  | -1.703812 | 9.917504  |
| 1 | 10011000 | 10.648606 | -0.503979 | 9.460751  |
| 6 | 10061003 | 12.003524 | -1.822680 | 13.982073 |
| 1 | 10011000 | 12.525694 | -2.219588 | 14.880686 |

1 10011000 11.070040 -2.408763 13.839621

H. ONIOM optimized structure for the  $[\text{Mo}(\text{CuNL})_6(\text{CN})_2]^{9+}$  ( $\text{Mo}^{\text{V}}$ )

42 10421006 8.647581 4.527896 14.529282  
29 10291003 6.573240 5.545958 9.760681  
29 10291003 11.417408 1.765464 10.891152  
29 10291003 12.178352 7.999704 12.507458  
29 10291003 11.825139 1.264246 17.311466  
29 10291003 10.383961 7.681132 18.465774  
29 10291003 5.136594 3.463219 18.359279  
7 10071001 7.256530 5.148856 11.554210  
7 10071001 10.421824 2.764290 12.257294  
7 10071001 10.895886 6.712644 13.247350  
7 10071001 10.628092 2.469544 16.334573  
7 10071001 9.728497 6.455823 17.082010  
7 10071001 6.452770 3.866670 16.963371  
7 10071002 6.696186 7.165899 14.675725  
7 10071002 6.950234 1.793417 13.879559  
7 10071003 5.948743 5.938520 7.932222  
7 10071003 5.039858 6.556915 10.463319  
1 10011000 4.606639 6.063410 11.277052  
1 10011000 5.352901 7.512393 10.751439  
7 10071003 6.369203 3.628702 9.364223  
1 10011000 7.169447 3.077522 9.749453  
1 10011000 5.471231 3.281113 9.772715  
7 10071003 8.250844 6.483571 9.322763  
1 10011000 8.557819 7.091345 10.116527  
1 10011000 8.996125 5.782731 9.105837  
7 10071003 10.318611 2.560381 9.463134  
1 10011000 9.410309 2.046512 9.396657  
1 10011000 10.140500 3.574363 9.645694  
7 10071003 10.906017 0.031979 11.668864  
1 10011000 9.902058 0.032059 11.961124  
7 10071003 13.472134 9.287941 11.762012  
7 10071003 10.977687 9.508418 12.903545  
1 10011000 10.235910 9.566914 12.168381  
1 10011000 10.536450 9.399830 13.845178  
7 10071003 12.110443 7.124475 10.744618  
1 10011000 12.710668 6.267944 10.756099  
1 10011000 11.129932 6.865548 10.490700  
7 10071003 13.545233 7.463243 13.819170  
1 10011000 13.351014 7.927304 14.736198  
1 10011000 13.559141 6.424954 13.943138  
7 10071003 13.049823 0.059294 18.277200  
7 10071003 12.484265 0.496158 15.622015  
1 10011000 11.694031 0.322605 14.959847  
1 10011000 13.174745 1.149418 15.185348  
7 10071003 10.318058 0.415827 18.250456  
1 10011000 9.625232 1.131269 18.569175  
1 10011000 9.851913 -0.271215 17.614252  
7 10071003 12.756954 2.789944 18.137483  
1 10011000 12.911942 3.555125 17.441928

|   |          |           |          |           |
|---|----------|-----------|----------|-----------|
| 1 | 10011000 | 12.192579 | 3.149891 | 18.941190 |
| 7 | 10071003 | 11.057130 | 8.919854 | 19.843805 |
| 7 | 10071003 | 10.807186 | 9.044171 | 17.108266 |
| 1 | 10011000 | 11.705024 | 8.796533 | 16.632163 |
| 1 | 10011000 | 10.040429 | 9.117200 | 16.400975 |
| 7 | 10071003 | 11.762209 | 6.390258 | 19.023754 |
| 1 | 10011000 | 11.330160 | 5.658000 | 19.632979 |
| 1 | 10011000 | 12.210993 | 5.941084 | 18.193096 |
| 7 | 10071003 | 8.634459  | 7.701609 | 19.367311 |
| 1 | 10011000 | 7.983414  | 8.339383 | 18.854171 |
| 1 | 10011000 | 8.227812  | 6.739835 | 19.412312 |
| 7 | 10071003 | 3.814251  | 3.058100 | 19.765943 |
| 7 | 10071003 | 5.482121  | 5.183605 | 19.252362 |
| 1 | 10011000 | 6.356647  | 5.108975 | 19.820961 |
| 1 | 10011000 | 5.575471  | 5.958500 | 18.556358 |
| 7 | 10071003 | 6.135874  | 1.857385 | 18.906896 |
| 1 | 10011000 | 5.929185  | 1.074194 | 18.245127 |
| 1 | 10011000 | 7.164512  | 2.044362 | 18.924844 |
| 7 | 10071003 | 3.692572  | 3.315232 | 17.029350 |
| 1 | 10011000 | 3.368408  | 4.271923 | 16.757788 |
| 1 | 10011000 | 4.016077  | 2.796233 | 16.181054 |
| 6 | 10061001 | 7.706823  | 4.929597 | 12.607079 |
| 6 | 10061001 | 9.824983  | 3.374251 | 13.052277 |
| 6 | 10061001 | 10.138402 | 5.943056 | 13.690894 |
| 6 | 10061001 | 9.936050  | 3.189271 | 15.730296 |
| 6 | 10061001 | 9.349398  | 5.755062 | 16.230443 |
| 6 | 10061001 | 7.224495  | 4.089540 | 16.118714 |
| 6 | 10061002 | 7.402796  | 6.206527 | 14.604303 |
| 6 | 10061002 | 7.559081  | 2.788390 | 14.133257 |
| 6 | 10061003 | 4.079300  | 6.656026 | 9.371514  |
| 1 | 10011000 | 3.497808  | 5.711428 | 9.302119  |
| 1 | 10011000 | 3.364975  | 7.487166 | 9.562440  |
| 6 | 10061003 | 4.826520  | 6.896978 | 8.058893  |
| 1 | 10011000 | 4.125324  | 6.818806 | 7.197322  |
| 1 | 10011000 | 5.193858  | 7.946946 | 8.079664  |
| 6 | 10061003 | 6.335042  | 3.507744 | 7.913324  |
| 1 | 10011000 | 5.891009  | 2.531406 | 7.619107  |
| 1 | 10011000 | 7.371242  | 3.550419 | 7.512937  |
| 6 | 10061003 | 5.510172  | 4.656209 | 7.335248  |
| 1 | 10011000 | 4.443361  | 4.445360 | 7.570983  |
| 1 | 10011000 | 5.597083  | 4.672047 | 6.225077  |
| 6 | 10061003 | 7.985583  | 7.302229 | 8.148372  |
| 1 | 10011000 | 8.940088  | 7.573070 | 7.644938  |
| 1 | 10011000 | 7.479901  | 8.242503 | 8.457072  |
| 6 | 10061003 | 7.088309  | 6.524105 | 7.189966  |
| 1 | 10011000 | 7.716086  | 5.731606 | 6.725012  |
| 1 | 10011000 | 6.740177  | 7.185934 | 6.364721  |
| 6 | 10061003 | 11.067085 | 2.404237 | 8.224025  |
| 1 | 10011000 | 10.388310 | 2.509780 | 7.349193  |
| 1 | 10011000 | 11.842991 | 3.197198 | 8.155970  |
| 6 | 10061003 | 11.732009 | 1.029562 | 8.211706  |
| 1 | 10011000 | 10.928823 | 0.278133 | 8.043134  |

|   |          |           |           |           |
|---|----------|-----------|-----------|-----------|
| 6 | 10061003 | 11.799676 | 10.710710 | 12.877011 |
| 1 | 10011000 | 12.342672 | 10.810633 | 13.841762 |
| 1 | 10011000 | 11.159906 | 11.611341 | 12.746704 |
| 6 | 10061003 | 12.802480 | 10.608449 | 11.728699 |
| 1 | 10011000 | 13.539830 | 11.440885 | 11.786191 |
| 1 | 10011000 | 12.233296 | 10.747938 | 10.782927 |
| 6 | 10061003 | 12.634369 | 8.084753  | 9.782962  |
| 1 | 10011000 | 11.840217 | 8.815640  | 9.517469  |
| 1 | 10011000 | 12.948923 | 7.563805  | 8.851640  |
| 6 | 10061003 | 13.823434 | 8.817426  | 10.402287 |
| 1 | 10011000 | 14.139335 | 9.661198  | 9.747973  |
| 1 | 10011000 | 14.671808 | 8.098150  | 10.431563 |
| 6 | 10061003 | 14.826223 | 7.916749  | 13.294704 |
| 1 | 10011000 | 15.190985 | 7.196539  | 12.530814 |
| 1 | 10011000 | 15.580563 | 7.965457  | 14.110877 |
| 6 | 10061003 | 14.649671 | 9.294850  | 12.660205 |
| 1 | 10011000 | 15.575470 | 9.589934  | 12.116347 |
| 1 | 10011000 | 14.518963 | 10.023278 | 13.491031 |
| 6 | 10061003 | 13.907643 | -0.597440 | 17.264435 |
| 1 | 10011000 | 14.806196 | 0.018190  | 17.037281 |
| 6 | 10061003 | 10.882991 | -0.276066 | 19.401726 |
| 1 | 10011000 | 10.175924 | -1.052418 | 19.768571 |
| 1 | 10011000 | 11.052718 | 0.450688  | 20.225300 |
| 6 | 10061003 | 12.209943 | -0.921295 | 19.002674 |
| 1 | 10011000 | 11.968166 | -1.797451 | 18.361136 |
| 1 | 10011000 | 12.732110 | -1.316717 | 19.903343 |
| 6 | 10061003 | 14.038259 | 2.289362  | 18.616226 |
| 1 | 10011000 | 14.456298 | 2.976248  | 19.385309 |
| 1 | 10011000 | 14.757445 | 2.240420  | 17.770293 |
| 6 | 10061003 | 13.843331 | 0.894592  | 19.207783 |
| 1 | 10011000 | 14.830438 | 0.430176  | 19.431543 |
| 1 | 10011000 | 13.319897 | 1.022292  | 20.181193 |
| 6 | 10061003 | 10.951873 | 10.310202 | 17.813812 |
| 1 | 10011000 | 9.947650  | 10.745650 | 18.006359 |
| 1 | 10011000 | 11.526668 | 11.032571 | 17.193024 |
| 6 | 10061003 | 11.671374 | 10.068489 | 19.139127 |
| 1 | 10011000 | 12.739569 | 9.869955  | 18.899863 |
| 1 | 10011000 | 11.647519 | 10.989646 | 19.764344 |
| 6 | 10061003 | 12.758045 | 7.140395  | 19.777161 |
| 1 | 10011000 | 13.449780 | 7.651561  | 19.073180 |
| 1 | 10011000 | 13.359553 | 6.451946  | 20.410847 |
| 6 | 10061003 | 12.053057 | 8.177283  | 20.650075 |
| 1 | 10011000 | 11.566330 | 7.626666  | 21.485360 |
| 1 | 10011000 | 12.799057 | 8.864462  | 21.109416 |
| 6 | 10061003 | 8.864973  | 8.206800  | 20.714266 |
| 1 | 10011000 | 7.912574  | 8.577976  | 21.154214 |
| 1 | 10011000 | 9.244736  | 7.385278  | 21.359232 |
| 6 | 10061003 | 9.893241  | 9.336281  | 20.659705 |
| 1 | 10011000 | 9.384948  | 10.220017 | 20.214508 |
| 1 | 10011000 | 10.200778 | 9.626819  | 21.689663 |
| 6 | 10061003 | 4.344719  | 5.435186  | 20.126608 |
| 1 | 10011000 | 3.500862  | 5.844110  | 19.530047 |



|   |          |           |           |           |
|---|----------|-----------|-----------|-----------|
| 1 | 10011000 | 4.614539  | 6.185538  | 20.902387 |
| 6 | 10061003 | 3.921055  | 4.124903  | 20.787702 |
| 1 | 10011000 | 2.961261  | 4.262679  | 21.335252 |
| 1 | 10011000 | 4.693260  | 3.877733  | 21.549651 |
| 6 | 10061003 | 5.671503  | 1.513364  | 20.244051 |
| 1 | 10011000 | 6.182155  | 2.157790  | 20.991848 |
| 1 | 10011000 | 5.918196  | 0.453671  | 20.476216 |
| 6 | 10061003 | 4.161449  | 1.730465  | 20.322886 |
| 1 | 10011000 | 3.682269  | 0.911639  | 19.741712 |
| 1 | 10011000 | 3.811674  | 1.625594  | 21.374903 |
| 6 | 10061003 | 2.480489  | 3.049457  | 19.122439 |
| 1 | 10011000 | 2.035478  | 4.069045  | 19.103106 |
| 6 | 10061003 | 2.607200  | 2.586597  | 17.672281 |
| 1 | 10011000 | 2.823536  | 1.496773  | 17.644503 |
| 1 | 10011000 | 1.651883  | 2.762138  | 17.130182 |
| 1 | 10011000 | 1.766159  | 2.397061  | 19.673967 |
| 1 | 10011000 | 14.275801 | -1.585670 | 17.621945 |
| 6 | 10061003 | 13.134119 | -0.763479 | 15.957675 |
| 1 | 10011000 | 13.824031 | -1.069752 | 15.140552 |
| 1 | 10011000 | 12.366240 | -1.558390 | 16.074868 |
| 1 | 10011000 | 11.517052 | -0.175851 | 12.491566 |
| 1 | 10011000 | 12.433795 | 0.948821  | 7.350919  |
| 7 | 10071003 | 13.102861 | 2.624516  | 11.438092 |
| 1 | 10011000 | 13.180992 | 2.666357  | 12.480170 |
| 1 | 10011000 | 13.147134 | 3.590876  | 11.040118 |
| 7 | 10071003 | 12.424430 | 0.795753  | 9.499846  |
| 6 | 10061003 | 13.798917 | 1.346679  | 9.489202  |
| 1 | 10011000 | 14.534957 | 0.598376  | 9.117115  |
| 1 | 10011000 | 13.872774 | 2.231687  | 8.818909  |
| 6 | 10061003 | 12.411293 | -0.636878 | 9.876063  |
| 1 | 10011000 | 12.513156 | -1.293896 | 8.982854  |
| 1 | 10011000 | 13.257956 | -0.883430 | 10.554461 |
| 6 | 10061003 | 11.121875 | -0.965137 | 10.628683 |
| 1 | 10011000 | 11.189323 | -1.980922 | 11.077616 |
| 1 | 10011000 | 10.263896 | -0.956288 | 9.922287  |
| 6 | 10061003 | 14.182101 | 1.813031  | 10.892092 |
| 1 | 10011000 | 15.125141 | 2.402067  | 10.854579 |
| 1 | 10011000 | 14.352058 | 0.931525  | 11.547331 |

I. ONIOM final structure for the  $[\text{Mo}(\text{CuCNL})_6(\text{CN})_2]^{8+}$  ( $\text{Mo}^{\text{IV,T}}$ ) optimization, including in the QM region, in addition to the Mo and the eight CN fragments, one of the  $[\text{Cu}(\text{tris}(2\text{-aminoethyl})\text{amine})]^+$  ligands, in order to describe accurately the hydrogen bond formation. The initial structure for the optimization is the eight-coordinated complex and the final point is a seven-coordinated complex (structure shown here). The optimization stops because of the changes in the connectivity, which poses problems to the ONIOM calculation. Further optimization of this structure leads, as expected, to a similar seven-coordinated complex.

|    |          |           |          |           |
|----|----------|-----------|----------|-----------|
| 42 | 10421006 | 8.687726  | 4.551355 | 14.474994 |
| 29 | 10291003 | 7.567248  | 8.784308 | 12.391084 |
| 29 | 10291003 | 14.014347 | 0.667441 | 12.098417 |
| 29 | 10291003 | 12.713967 | 6.677931 | 11.818104 |
| 29 | 10291003 | 12.663898 | 3.022701 | 17.201079 |
| 29 | 10291003 | 10.647437 | 8.211273 | 17.873165 |

|    |          |           |           |           |
|----|----------|-----------|-----------|-----------|
| 29 | 10291003 | 6.887647  | 2.723765  | 18.587134 |
| 7  | 10071001 | 7.625150  | 6.870968  | 12.640002 |
| 7  | 10071001 | 12.454470 | 1.690699  | 12.598056 |
| 7  | 10071001 | 11.117757 | 5.946189  | 12.619122 |
| 7  | 10071001 | 10.883417 | 3.246666  | 16.491106 |
| 7  | 10071001 | 10.046239 | 6.849712  | 16.622282 |
| 7  | 10071001 | 6.844021  | 3.356106  | 16.765163 |
| 7  | 10071001 | 7.019505  | 6.881646  | 16.286776 |
| 7  | 10071001 | 7.925018  | 2.060597  | 12.830724 |
| 7  | 10071003 | 7.542611  | 10.737365 | 12.113875 |
| 7  | 10071003 | 9.151603  | 9.026606  | 13.539844 |
| 1  | 10011000 | 9.078647  | 8.440936  | 14.401473 |
| 1  | 10011000 | 10.016160 | 8.769596  | 13.012009 |
| 7  | 10071003 | 5.771991  | 8.916553  | 13.185330 |
| 1  | 10011000 | 5.155277  | 8.140908  | 12.851582 |
| 1  | 10011000 | 5.848930  | 8.886087  | 14.228035 |
| 7  | 10071003 | 7.761711  | 8.570217  | 10.441666 |
| 1  | 10011000 | 8.456321  | 7.824179  | 10.209574 |
| 1  | 10011000 | 6.833252  | 8.327464  | 10.025652 |
| 7  | 10071003 | 13.684842 | 0.954788  | 10.180182 |
| 1  | 10011000 | 12.937428 | 0.301525  | 9.850655  |
| 1  | 10011000 | 13.402287 | 1.943481  | 9.990826  |
| 7  | 10071003 | 13.280498 | -0.923818 | 13.000752 |
| 1  | 10011000 | 12.255840 | -1.021896 | 12.816621 |
| 7  | 10071003 | 14.377887 | 7.407541  | 11.045899 |
| 7  | 10071003 | 11.697768 | 7.643126  | 10.439310 |
| 1  | 10011000 | 11.434493 | 6.985452  | 9.669882  |
| 1  | 10011000 | 10.839601 | 8.079247  | 10.843920 |
| 7  | 10071003 | 13.393679 | 4.872477  | 11.431391 |
| 1  | 10011000 | 13.777846 | 4.455637  | 12.309673 |
| 1  | 10011000 | 12.635860 | 4.263682  | 11.047111 |
| 7  | 10071003 | 13.171160 | 7.590012  | 13.501371 |
| 1  | 10011000 | 12.637237 | 8.487136  | 13.556653 |
| 1  | 10011000 | 12.954404 | 6.992606  | 14.331021 |
| 7  | 10071003 | 14.499905 | 2.909563  | 17.906388 |
| 7  | 10071003 | 12.914720 | 1.272735  | 16.341244 |
| 1  | 10011000 | 12.078426 | 0.662769  | 16.489534 |
| 1  | 10011000 | 13.075610 | 1.404939  | 15.318676 |
| 7  | 10071003 | 12.007737 | 3.053747  | 19.058644 |
| 1  | 10011000 | 11.235010 | 3.743690  | 19.185843 |
| 1  | 10011000 | 11.669110 | 2.099241  | 19.318870 |
| 7  | 10071003 | 13.206425 | 4.672321  | 16.259627 |
| 1  | 10011000 | 12.850184 | 4.667248  | 15.276275 |
| 1  | 10011000 | 12.827167 | 5.506307  | 16.762462 |
| 7  | 10071003 | 11.238423 | 9.578626  | 19.181323 |
| 7  | 10071003 | 12.019616 | 8.904314  | 16.618263 |
| 1  | 10011000 | 12.849580 | 8.270199  | 16.625810 |
| 1  | 10011000 | 11.640411 | 8.975496  | 15.650788 |
| 7  | 10071003 | 11.128737 | 6.824974  | 19.209826 |
| 1  | 10011000 | 10.268815 | 6.496319  | 19.698630 |
| 1  | 10011000 | 11.603603 | 6.017398  | 18.752916 |
| 7  | 10071003 | 8.843487  | 9.015648  | 17.898350 |

|   |          |           |           |           |
|---|----------|-----------|-----------|-----------|
| 1 | 10011000 | 8.721682  | 9.610479  | 17.048749 |
| 1 | 10011000 | 8.105823  | 8.276402  | 17.922329 |
| 7 | 10071003 | 6.999509  | 2.093840  | 20.452808 |
| 7 | 10071003 | 4.928456  | 2.762620  | 18.755572 |
| 1 | 10011000 | 4.610842  | 3.746546  | 18.913707 |
| 1 | 10011000 | 4.470625  | 2.373635  | 17.899734 |
| 7 | 10071003 | 7.939321  | 4.303675  | 19.122818 |
| 1 | 10011000 | 8.930821  | 4.181967  | 18.817473 |
| 1 | 10011000 | 7.548180  | 5.176009  | 18.699471 |
| 7 | 10071003 | 7.776559  | 1.054157  | 18.032456 |
| 1 | 10011000 | 7.059816  | 0.382758  | 17.672563 |
| 1 | 10011000 | 8.494831  | 1.229887  | 17.294111 |
| 6 | 10061001 | 7.699981  | 5.726229  | 12.801685 |
| 6 | 10061001 | 11.516004 | 2.294420  | 12.903578 |
| 6 | 10061001 | 10.165459 | 5.505409  | 13.105846 |
| 6 | 10061001 | 9.824720  | 3.413258  | 16.055028 |
| 6 | 10061001 | 9.616269  | 6.045196  | 15.877030 |
| 6 | 10061001 | 6.857268  | 3.757427  | 15.678992 |
| 6 | 10061001 | 7.595933  | 6.061993  | 15.674501 |
| 6 | 10061001 | 7.487803  | 2.922041  | 13.467926 |
| 6 | 10061003 | 9.198727  | 10.434508 | 13.909584 |
| 1 | 10011000 | 8.504771  | 10.620746 | 14.756892 |
| 1 | 10011000 | 10.224620 | 10.712466 | 14.238334 |
| 6 | 10061003 | 8.783709  | 11.282290 | 12.710182 |
| 1 | 10011000 | 8.655532  | 12.345333 | 13.015946 |
| 1 | 10011000 | 9.625884  | 11.254533 | 11.983523 |
| 6 | 10061003 | 5.227090  | 10.201167 | 12.765116 |
| 1 | 10011000 | 4.393496  | 10.503407 | 13.436873 |
| 1 | 10011000 | 4.822931  | 10.113482 | 11.733537 |
| 6 | 10061003 | 6.334067  | 11.255014 | 12.795986 |
| 1 | 10011000 | 6.540184  | 11.482097 | 13.865291 |
| 1 | 10011000 | 5.977294  | 12.201390 | 12.329992 |
| 6 | 10061003 | 8.216692  | 9.851700  | 9.919932  |
| 1 | 10011000 | 8.016308  | 9.915547  | 8.827596  |
| 1 | 10011000 | 9.312668  | 9.949857  | 10.074458 |
| 6 | 10061003 | 7.490127  | 10.975959 | 10.653511 |
| 1 | 10011000 | 6.440852  | 10.984528 | 10.283551 |
| 1 | 10011000 | 7.934380  | 11.961160 | 10.384878 |
| 6 | 10061003 | 14.939101 | 0.658878  | 9.500727  |
| 1 | 10011000 | 14.755940 | 0.471671  | 8.419639  |
| 1 | 10011000 | 15.623490 | 1.530196  | 9.589204  |
| 6 | 10061003 | 15.583185 | -0.568450 | 10.144832 |
| 1 | 10011000 | 14.982976 | -1.453037 | 9.836101  |
| 6 | 10061003 | 12.585808 | 8.678789  | 9.928379  |
| 1 | 10011000 | 12.591818 | 9.541055  | 10.629890 |
| 1 | 10011000 | 12.225658 | 9.040456  | 8.940013  |
| 6 | 10061003 | 13.999852 | 8.111472  | 9.798274  |
| 1 | 10011000 | 14.720017 | 8.925178  | 9.554861  |
| 1 | 10011000 | 13.995163 | 7.417168  | 8.928983  |
| 6 | 10061003 | 14.451807 | 5.023285  | 10.442158 |
| 1 | 10011000 | 14.002598 | 5.134565  | 9.431772  |
| 1 | 10011000 | 15.101580 | 4.120965  | 10.430403 |

|   |          |           |           |           |
|---|----------|-----------|-----------|-----------|
| 6 | 10061003 | 15.277497 | 6.262088  | 10.778137 |
| 1 | 10011000 | 15.988942 | 6.487072  | 9.951592  |
| 1 | 10011000 | 15.890471 | 6.013113  | 11.672957 |
| 6 | 10061003 | 14.597924 | 7.870579  | 13.450434 |
| 1 | 10011000 | 15.166636 | 6.948907  | 13.700071 |
| 1 | 10011000 | 14.862476 | 8.654252  | 14.194454 |
| 6 | 10061003 | 14.959904 | 8.335434  | 12.042694 |
| 1 | 10011000 | 16.065567 | 8.411526  | 11.934113 |
| 1 | 10011000 | 14.553080 | 9.364225  | 11.922234 |
| 6 | 10061003 | 15.136240 | 1.745613  | 17.247844 |
| 1 | 10011000 | 15.591806 | 2.033542  | 16.276161 |
| 6 | 10061003 | 13.142367 | 3.416678  | 19.896582 |
| 1 | 10011000 | 12.952080 | 3.119449  | 20.951519 |
| 1 | 10011000 | 13.288297 | 4.517642  | 19.871096 |
| 6 | 10061003 | 14.395593 | 2.719249  | 19.371590 |
| 1 | 10011000 | 14.305515 | 1.641996  | 19.634055 |
| 1 | 10011000 | 15.298499 | 3.103260  | 19.898330 |
| 6 | 10061003 | 14.661696 | 4.723769  | 16.251380 |
| 1 | 10011000 | 15.008236 | 5.771298  | 16.107679 |
| 1 | 10011000 | 15.054431 | 4.119359  | 15.407147 |
| 6 | 10061003 | 15.190669 | 4.175275  | 17.572027 |
| 1 | 10011000 | 16.293677 | 4.033375  | 17.515578 |
| 1 | 10011000 | 15.002974 | 4.952209  | 18.346216 |
| 6 | 10061003 | 12.403990 | 10.239892 | 17.104563 |
| 1 | 10011000 | 11.655970 | 10.985957 | 16.767006 |
| 1 | 10011000 | 13.391348 | 10.535241 | 16.687703 |
| 6 | 10061003 | 12.466842 | 10.220122 | 18.634939 |
| 1 | 10011000 | 13.376037 | 9.656497  | 18.928084 |
| 1 | 10011000 | 12.590194 | 11.255036 | 19.026829 |
| 6 | 10061003 | 12.036805 | 7.461721  | 20.176151 |
| 1 | 10011000 | 13.062681 | 7.499651  | 19.756981 |
| 1 | 10011000 | 12.074602 | 6.872833  | 21.118296 |
| 6 | 10061003 | 11.536021 | 8.876925  | 20.461414 |
| 1 | 10011000 | 10.624205 | 8.786222  | 21.088355 |
| 1 | 10011000 | 12.285234 | 9.436794  | 21.063672 |
| 6 | 10061003 | 8.770821  | 9.835547  | 19.104886 |
| 1 | 10011000 | 7.947409  | 10.578705 | 19.011058 |
| 1 | 10011000 | 8.549383  | 9.189505  | 19.978490 |
| 6 | 10061003 | 10.111856 | 10.553045 | 19.312934 |
| 1 | 10011000 | 10.182508 | 11.353809 | 18.547905 |
| 1 | 10011000 | 10.124420 | 11.055260 | 20.304894 |
| 6 | 10061003 | 4.598223  | 1.941490  | 19.913874 |
| 1 | 10011000 | 4.601973  | 0.869129  | 19.621911 |
| 1 | 10011000 | 3.580295  | 2.192823  | 20.285505 |
| 6 | 10061003 | 5.632135  | 2.178136  | 21.015943 |
| 1 | 10011000 | 5.486849  | 1.446708  | 21.842966 |
| 1 | 10011000 | 5.432628  | 3.186479  | 21.441052 |
| 6 | 10061003 | 7.873593  | 4.390610  | 20.575191 |
| 1 | 10011000 | 6.921891  | 4.879098  | 20.876201 |
| 1 | 10011000 | 8.713441  | 5.007531  | 20.963567 |
| 6 | 10061003 | 7.942320  | 2.985359  | 21.165510 |
| 1 | 10011000 | 8.992392  | 2.634605  | 21.052232 |

|   |          |           |           |           |
|---|----------|-----------|-----------|-----------|
| 1 | 10011000 | 7.727175  | 3.015266  | 22.257644 |
| 6 | 10061003 | 7.491447  | 0.697583  | 20.419122 |
| 1 | 10011000 | 6.652093  | -0.023870 | 20.305703 |
| 6 | 10061003 | 8.415739  | 0.504777  | 19.219841 |
| 1 | 10011000 | 9.378103  | 1.029630  | 19.399842 |
| 1 | 10011000 | 8.634172  | -0.576257 | 19.074485 |
| 1 | 10011000 | 8.021599  | 0.428711  | 21.360838 |
| 1 | 10011000 | 15.956853 | 1.325224  | 17.872138 |
| 6 | 10061003 | 14.089687 | 0.666400  | 16.957494 |
| 1 | 10011000 | 14.520216 | -0.107822 | 16.284647 |
| 1 | 10011000 | 13.795465 | 0.167654  | 17.906034 |
| 1 | 10011000 | 13.448773 | -0.852075 | 14.030327 |
| 1 | 10011000 | 16.610214 | -0.720355 | 9.742125  |
| 7 | 10071003 | 15.219594 | 1.894271  | 13.056240 |
| 1 | 10011000 | 14.797698 | 2.219920  | 13.952987 |
| 1 | 10011000 | 15.439368 | 2.716694  | 12.450414 |
| 7 | 10071003 | 15.595185 | -0.416137 | 11.618119 |
| 6 | 10061003 | 16.791461 | 0.324047  | 12.082431 |
| 1 | 10011000 | 17.638264 | -0.364161 | 12.304680 |
| 1 | 10011000 | 17.151755 | 1.036509  | 11.307204 |
| 6 | 10061003 | 15.464932 | -1.721818 | 12.304306 |
| 1 | 10011000 | 15.998045 | -2.528499 | 11.751921 |
| 1 | 10011000 | 15.904417 | -1.686455 | 13.326210 |
| 6 | 10061003 | 13.989816 | -2.075880 | 12.463110 |
| 1 | 10011000 | 13.876671 | -2.949379 | 13.142640 |
| 1 | 10011000 | 13.561038 | -2.348527 | 11.474625 |
| 6 | 10061003 | 16.439222 | 1.145769  | 13.320204 |
| 1 | 10011000 | 17.271119 | 1.840715  | 13.570058 |
| 1 | 10011000 | 16.279238 | 0.469628  | 14.187625 |

J. DFT optimized  $[\text{Mo}(\text{CN})_2(\text{CN}-\text{Cu}(\text{tris}(2\text{-aminoethyl})\text{amine})_6)]^{8+}$  for  $S = 4$ , with a seven coordinated Mo.

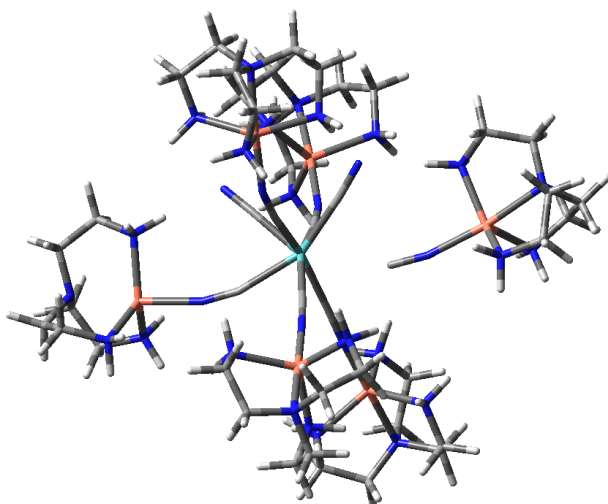

|    |           |          |           |
|----|-----------|----------|-----------|
| Mo | 9.281782  | 4.484088 | 14.436141 |
| Cu | 6.103609  | 6.769926 | 10.854114 |
| Cu | 10.103122 | 0.281830 | 11.216627 |
| Cu | 13.519187 | 7.239424 | 12.181633 |

|    |           |           |           |
|----|-----------|-----------|-----------|
| Cu | 13.048179 | 2.388960  | 17.950508 |
| Cu | 9.149407  | 9.291081  | 17.846777 |
| Cu | 5.698802  | 2.054758  | 17.511131 |
| N  | 7.710293  | 6.312728  | 12.074369 |
| N  | 10.365653 | 1.852755  | 12.515508 |
| N  | 11.981770 | 6.164899  | 13.038495 |
| N  | 11.700232 | 3.255410  | 16.653907 |
| N  | 9.841546  | 7.720053  | 16.741044 |
| N  | 7.439302  | 2.527767  | 16.496351 |
| N  | 6.776098  | 6.056801  | 16.033804 |
| N  | 6.964153  | 2.930709  | 12.710740 |
| N  | 4.295222  | 7.106649  | 9.633994  |
| N  | 5.573791  | 8.736779  | 11.603494 |
| H  | 5.737397  | 8.853629  | 12.613827 |
| H  | 6.150138  | 9.463922  | 11.151531 |
| N  | 4.981777  | 5.143129  | 11.567088 |
| H  | 5.567986  | 4.312497  | 11.784402 |
| H  | 4.561194  | 5.419042  | 12.466862 |
| N  | 7.049079  | 6.881021  | 8.944236  |
| H  | 7.915294  | 7.436565  | 8.927205  |
| H  | 7.338401  | 5.928578  | 8.675086  |
| N  | 11.094242 | 1.080634  | 9.496379  |
| H  | 10.541157 | 1.883402  | 9.161713  |
| H  | 12.030394 | 1.461372  | 9.692623  |
| N  | 8.026678  | 0.237670  | 11.530261 |
| H  | 7.623107  | 1.172798  | 11.750430 |
| N  | 15.138416 | 8.415060  | 11.227876 |
| N  | 12.337464 | 8.312773  | 10.781031 |
| H  | 12.103714 | 7.681385  | 10.000259 |
| H  | 11.434269 | 8.605770  | 11.180110 |
| N  | 14.737449 | 5.615553  | 11.512586 |
| H  | 15.291887 | 5.253377  | 12.303783 |
| H  | 14.186997 | 4.811499  | 11.180440 |
| N  | 14.212458 | 8.291846  | 13.916806 |
| H  | 13.545775 | 9.054062  | 14.113506 |
| H  | 14.216563 | 7.720267  | 14.773495 |
| N  | 14.507189 | 1.445963  | 19.372584 |
| N  | 12.452328 | 0.346363  | 17.723748 |
| H  | 11.431129 | 0.244436  | 17.636666 |
| H  | 12.842986 | -0.012099 | 16.838816 |
| N  | 12.464971 | 3.417856  | 19.729797 |
| H  | 12.243478 | 4.408601  | 19.558782 |
| H  | 11.592061 | 3.003282  | 20.088800 |
| N  | 14.855421 | 2.981961  | 16.988762 |
| H  | 14.791437 | 2.930528  | 15.962808 |
| H  | 15.010534 | 3.977076  | 17.211364 |
| N  | 8.178348  | 10.789709 | 19.159007 |
| N  | 9.933875  | 11.166621 | 16.924583 |
| H  | 10.899528 | 11.346351 | 17.241546 |
| H  | 9.994565  | 11.159052 | 15.896757 |
| N  | 10.255732 | 8.914340  | 19.594248 |
| H  | 9.952430  | 7.972086  | 19.883161 |

|   |           |           |           |
|---|-----------|-----------|-----------|
| H | 11.272998 | 8.841684  | 19.449109 |
| N | 7.175833  | 8.956095  | 17.258009 |
| H | 6.968985  | 9.517958  | 16.419781 |
| H | 7.025763  | 7.959294  | 16.985199 |
| N | 3.712906  | 1.751084  | 18.393219 |
| N | 5.320863  | 4.061052  | 17.966084 |
| H | 5.758596  | 4.295877  | 18.869124 |
| H | 5.732844  | 4.729134  | 17.280018 |
| N | 6.301968  | 0.874310  | 19.275262 |
| H | 6.479233  | -0.108513 | 19.013849 |
| H | 7.168342  | 1.185581  | 19.735039 |
| N | 4.905484  | 0.787156  | 16.015346 |
| H | 4.804753  | 1.378641  | 15.175302 |
| H | 5.545319  | 0.030190  | 15.734490 |
| C | 8.349747  | 5.739573  | 12.889068 |
| C | 10.195976 | 2.789946  | 13.221485 |
| C | 11.045509 | 5.607172  | 13.502394 |
| C | 10.881466 | 3.700001  | 15.923191 |
| C | 9.997299  | 6.739146  | 16.088304 |
| C | 8.169576  | 3.132948  | 15.788726 |
| C | 7.683209  | 5.566506  | 15.450553 |
| C | 7.776092  | 3.484322  | 13.371361 |
| C | 4.137699  | 8.979769  | 11.276964 |
| H | 3.514969  | 8.414165  | 11.999064 |
| H | 3.848113  | 10.046885 | 11.387881 |
| C | 3.874256  | 8.528338  | 9.845513  |
| H | 2.799581  | 8.648656  | 9.581542  |
| H | 4.438253  | 9.169255  | 9.140003  |
| C | 3.916244  | 4.832147  | 10.578093 |
| H | 3.141839  | 4.147494  | 10.986077 |
| H | 4.384371  | 4.305609  | 9.721642  |
| C | 3.268221  | 6.134478  | 10.129616 |
| H | 2.734288  | 6.602972  | 10.980986 |
| H | 2.503114  | 5.955936  | 9.341272  |
| C | 6.083473  | 7.408880  | 7.934967  |
| H | 6.382930  | 7.168818  | 6.892959  |
| H | 6.079802  | 8.515020  | 8.003832  |
| C | 4.704275  | 6.836490  | 8.223479  |
| H | 4.705928  | 5.737748  | 8.071604  |
| H | 3.945799  | 7.246566  | 7.518460  |
| C | 11.174493 | 0.040778  | 8.427786  |
| H | 11.333668 | 0.476828  | 7.418663  |
| H | 12.060209 | -0.593202 | 8.629325  |
| C | 9.893251  | -0.782315 | 8.437460  |
| H | 9.031353  | -0.148763 | 8.145641  |
| C | 13.103999 | 9.484838  | 10.266749 |
| H | 13.061736 | 10.290024 | 11.028717 |
| H | 12.665158 | 9.907435  | 9.337596  |
| C | 14.541329 | 9.050240  | 10.011115 |
| H | 15.166750 | 9.910584  | 9.680299  |
| H | 14.575920 | 8.313814  | 9.181604  |
| C | 15.659232 | 6.107084  | 10.447386 |

|   |           |           |           |
|---|-----------|-----------|-----------|
| H | 15.079462 | 6.205812  | 9.507526  |
| H | 16.488466 | 5.399894  | 10.234606 |
| C | 16.230000 | 7.452128  | 10.881861 |
| H | 16.881827 | 7.880397  | 10.087287 |
| H | 16.874231 | 7.320705  | 11.774609 |
| C | 15.563912 | 8.859363  | 13.645093 |
| H | 16.308468 | 8.045876  | 13.763671 |
| H | 15.849114 | 9.650286  | 14.370803 |
| C | 15.578029 | 9.431340  | 12.233861 |
| H | 16.589784 | 9.814775  | 11.970268 |
| H | 14.889586 | 10.298080 | 12.173970 |
| C | 14.405538 | -0.030038 | 19.159612 |
| H | 15.060276 | -0.312334 | 18.308474 |
| C | 13.545405 | 3.287910  | 20.750461 |
| H | 13.198990 | 3.542413  | 21.775666 |
| H | 14.343529 | 4.019494  | 20.509818 |
| C | 14.075807 | 1.858528  | 20.741131 |
| H | 13.294310 | 1.154901  | 21.093591 |
| H | 14.924726 | 1.757289  | 21.455888 |
| C | 15.987981 | 2.154993  | 17.495659 |
| H | 16.980825 | 2.593808  | 17.259521 |
| H | 15.955476 | 1.174360  | 16.978045 |
| C | 15.846086 | 1.999446  | 19.004107 |
| H | 16.647649 | 1.342597  | 19.412258 |
| H | 15.972312 | 2.984380  | 19.499873 |
| C | 9.066747  | 12.292061 | 17.371355 |
| H | 8.135527  | 12.277946 | 16.769172 |
| H | 9.527275  | 13.289038 | 17.199447 |
| C | 8.768823  | 12.129551 | 18.856771 |
| H | 9.708912  | 12.234247 | 19.431235 |
| H | 8.093831  | 12.938776 | 19.216695 |
| C | 9.951378  | 9.911027  | 20.660585 |
| H | 10.632358 | 10.775469 | 20.530437 |
| H | 10.153350 | 9.518667  | 21.679598 |
| C | 8.491113  | 10.334700 | 20.545999 |
| H | 7.824796  | 9.480054  | 20.783797 |
| H | 8.258530  | 11.134438 | 21.285430 |
| C | 6.289971  | 9.361970  | 18.378202 |
| H | 5.214901  | 9.377651  | 18.095904 |
| H | 6.397529  | 8.607224  | 19.185543 |
| C | 6.713684  | 10.746790 | 18.855795 |
| H | 6.508783  | 11.486897 | 18.055763 |
| H | 6.123413  | 11.071422 | 19.741700 |
| C | 3.841581  | 4.220593  | 18.055970 |
| H | 3.434479  | 4.193887  | 17.023852 |
| H | 3.537489  | 5.200197  | 18.482548 |
| C | 3.271407  | 3.091539  | 18.902373 |
| H | 2.159885  | 3.135038  | 18.940709 |
| H | 3.619601  | 3.190323  | 19.950175 |
| C | 5.170057  | 0.919970  | 20.244576 |
| H | 5.207767  | 1.896100  | 20.771957 |
| H | 5.248385  | 0.144797  | 21.036532 |



|   |           |           |           |
|---|-----------|-----------|-----------|
| C | 3.853925  | 0.748514  | 19.493176 |
| H | 3.802215  | -0.269131 | 19.055625 |
| H | 2.991311  | 0.827834  | 20.193049 |
| C | 2.854475  | 1.260630  | 17.273985 |
| H | 2.574961  | 2.129406  | 16.644778 |
| C | 3.587188  | 0.225769  | 16.431883 |
| H | 3.776872  | -0.703467 | 17.005616 |
| H | 2.957487  | -0.066192 | 15.564879 |
| H | 1.902110  | 0.842449  | 17.672670 |
| H | 14.812218 | -0.564808 | 20.048841 |
| C | 12.970261 | -0.453635 | 18.870687 |
| H | 12.931042 | -1.548707 | 18.688769 |
| H | 12.307196 | -0.271493 | 19.742788 |
| H | 7.858913  | -0.323995 | 12.379886 |
| H | 9.950069  | -1.605114 | 7.688618  |
| N | 11.299912 | -1.293784 | 12.109575 |
| H | 11.318009 | -1.276216 | 13.138517 |
| H | 12.285409 | -1.196273 | 11.817846 |
| N | 9.622039  | -1.340990 | 9.797452  |
| C | 10.513534 | -2.499606 | 10.124523 |
| H | 10.074578 | -3.444463 | 9.732885  |
| H | 11.474647 | -2.367043 | 9.588554  |
| C | 8.174319  | -1.663829 | 10.004552 |
| H | 7.763184  | -2.161443 | 9.097977  |
| H | 8.097015  | -2.407176 | 10.825416 |
| C | 7.381978  | -0.412618 | 10.361011 |
| H | 6.319896  | -0.677274 | 10.552723 |
| H | 7.379939  | 0.310467  | 9.519424  |
| C | 10.765972 | -2.597674 | 11.623521 |
| H | 11.454101 | -3.445923 | 11.830048 |
| H | 9.826690  | -2.812897 | 12.173587 |

K. One of the Cu<sup>TB</sup>-Mo<sup>D</sup> dimers (dimer 5 according to Figure S1) obtained by overlaying the optimized fragments and fixing the Cu-N-C, Mo-C-N angles, as well as the torsion angle, according to the ONIOM optimized structure (F):

|    |          |          |          |
|----|----------|----------|----------|
| Mo | -1.96873 | 1.88535  | 0.12516  |
| Cu | 1.83368  | -1.80163 | -0.13116 |
| N  | -1.90900 | 2.11490  | 3.43811  |
| N  | -3.66972 | -0.74144 | 1.31613  |
| N  | -5.06034 | 3.06422  | -0.17566 |
| N  | -2.85429 | 0.36695  | -2.72508 |
| N  | -0.74518 | 3.71520  | -2.36272 |
| N  | 1.05795  | 2.99088  | 1.03832  |
| N  | -2.28899 | 5.11537  | 0.95012  |
| N  | 0.41887  | -0.41211 | -0.02965 |
| N  | 3.33111  | -3.24881 | -0.2441  |
| N  | 1.33968  | -2.69833 | 1.7084   |
| N  | 3.41051  | -0.40786 | -0.2124  |
| N  | 1.12107  | -2.64765 | -1.9262  |
| C  | -1.95579 | 1.99289  | 2.26213  |
| C  | -2.16995 | 3.95654  | 0.65547  |
| C  | -3.06896 | 0.18531  | 0.89105  |

|   |            |             |             |
|---|------------|-------------|-------------|
| C | -3.95195   | 2.65516     | -0.06354    |
| C | -2.54339   | 0.90058     | -1.71562    |
| C | -1.19892   | 3.03339     | -1.50875    |
| C | -0.02953   | 2.59790     | 0.71150     |
| C | -0.41887   | 0.41211     | 0.02965     |
| C | 3.04108    | -4.26431    | 0.84841     |
| C | 2.50156    | -3.57315    | 2.10359     |
| C | 4.63777    | -1.14854    | -0.67699    |
| C | 4.65209    | -2.53139    | -0.01968    |
| C | 1.78947    | -3.98938    | -2.08169    |
| C | 3.24684    | -3.86282    | -1.63079    |
| H | -5.97274   | 3.51047     | -0.23788    |
| H | -3.11180   | -0.07714    | -3.60556    |
| H | -4.18317   | -1.53248    | 1.70264     |
| H | -1.82342   | 2.29090     | 4.43727     |
| H | -0.32417   | 4.35242     | -3.03601    |
| H | 3.19458333 | 0.39100798  | -0.83926447 |
| H | 3.55294390 | -0.00343453 | 0.73535038  |
| H | 0.08710325 | -2.74053403 | -1.93253238 |
| H | 1.36167187 | -2.01591189 | -2.71673916 |
| H | 1.13036082 | -1.99600159 | 2.44379695  |
| H | 0.47312273 | -3.26081205 | 1.58741517  |
| H | 5.57712110 | -0.60030720 | -0.43343520 |
| H | 4.59336364 | -1.22176636 | -1.78596317 |
| H | 5.49035982 | -3.15566665 | -0.41105042 |
| H | 4.80788963 | -2.43414523 | 1.07801558  |
| H | 1.74500991 | -4.36231032 | -3.13101967 |
| H | 1.23020513 | -4.72398284 | -1.46099738 |
| H | 3.75900869 | -4.85451878 | -1.63528892 |
| H | 3.80984294 | -3.20529802 | -2.33011766 |
| H | 3.27170134 | -2.92547877 | 2.57840056  |
| H | 2.21482361 | -4.33422118 | 2.86580284  |
| H | 3.96455524 | -4.84920545 | 1.07476422  |
| H | 2.29182510 | -4.98669643 | 0.45294525  |

L. One of the Cu<sup>TB</sup>-Mo<sup>SA</sup> dimers (dimer 5 according to Figure S1) obtained by overlaying the optimized fragments and fixing the Cu-N-C, Mo-C-N angles, as well as the torsion angle, according to the ONIOM optimized structure (G):

|    |             |             |             |
|----|-------------|-------------|-------------|
| Mo | 2.89845000  | 0.01482000  | 0.03596000  |
| Cu | -2.45301000 | 0.13583000  | 0.25653000  |
| N  | 2.61310000  | 1.37443000  | 3.06037000  |
| N  | 2.00716000  | -2.60774000 | 2.06911000  |
| N  | 1.88063000  | -0.42290000 | -3.21694000 |
| N  | 5.10712000  | 1.73843000  | -1.76149000 |
| N  | 4.65071000  | -2.77988000 | -1.09055000 |
| N  | 5.81562000  | -0.16998000 | 1.57326000  |
| N  | 1.79118000  | 3.10275000  | -0.34707000 |
| N  | -0.59132000 | 0.03209000  | 0.06091000  |
| N  | -5.24395682 | 0.30699172  | 0.54127050  |
| N  | -2.96906526 | -1.06406541 | 1.92169625  |
| N  | -3.29729740 | -0.61935205 | -1.53162279 |
| N  | -2.91247792 | 2.17701763  | 0.55035075  |

|   |             |             |             |
|---|-------------|-------------|-------------|
| C | 2.73016000  | 0.85511000  | 2.00696000  |
| C | 2.19120000  | 1.98469000  | -0.16315000 |
| C | 2.20348000  | -1.68669000 | 1.35433000  |
| C | 2.29574000  | -0.36416000 | -2.11150000 |
| C | 4.29184000  | 1.13934000  | -1.15367000 |
| C | 3.97807000  | -1.91177000 | -0.65239000 |
| C | 4.77417000  | -0.08029000 | 0.98056000  |
| C | 0.59132000  | -0.03209000 | -0.06091000 |
| C | -5.42378986 | -0.54349960 | 1.72886935  |
| C | -4.34926326 | -1.64115711 | 1.87111782  |
| C | -4.62944529 | -0.03299435 | -1.88185228 |
| C | -5.66162140 | -0.24930184 | -0.75581238 |
| C | -4.14697258 | 2.42602936  | 1.35953735  |
| C | -5.38622481 | 1.76006982  | 0.72722639  |
| H | 5.26993000  | -3.51830000 | -1.43499000 |
| H | 1.51231000  | -0.45288000 | -4.17151000 |
| H | 1.85852000  | -3.40463000 | 2.69412000  |
| H | 2.55799000  | 1.86749000  | 3.95480000  |
| H | 5.81947000  | 2.29780000  | -2.23671000 |
| H | -2.60477062 | -0.42307174 | -2.27764131 |
| H | -3.36558432 | -1.65235683 | -1.45000977 |
| H | -2.08277175 | 2.59094422  | 1.01407213  |
| H | -2.99185181 | 2.62886477  | -0.38141625 |
| H | -2.25959793 | -1.81916990 | 1.95278287  |
| H | -2.84232602 | -0.49767263 | 2.78277411  |
| H | -5.04057858 | -0.46130108 | -2.82991803 |
| H | -4.47835408 | 1.05617109  | -2.06194347 |
| H | -6.64503980 | 0.16963324  | -1.10075789 |
| H | -5.82996426 | -1.34489834 | -0.62715622 |
| H | -4.35377314 | 3.51816014  | 1.48442820  |
| H | -3.96628240 | 2.01557872  | 2.37947020  |
| H | -6.28026132 | 2.02235847  | 1.35484653  |
| H | -5.57381683 | 2.22227646  | -0.27118065 |
| H | -4.39054264 | -2.33370403 | 0.99935616  |
| H | -4.58206094 | -2.25277445 | 2.77828597  |
| H | -6.43146540 | -1.03976121 | 1.74786381  |
| H | -5.39268554 | 0.11008599  | 2.63283358  |

M. One of the Cu<sup>TD</sup>-Mo<sup>D</sup> dimers (dimer 5 according to Figure S1) obtained by overlaying the optimized fragments and fixing the Cu-N-C, Mo-C-N angles, as well as the torsion angle, according to the ONIOM optimized structure (H):

|    |             |             |             |
|----|-------------|-------------|-------------|
| Mo | 2.49128     | 0.44295     | 1.16688     |
| Cu | -2.22882    | -0.43969    | -0.96980    |
| N  | 0.39364     | 2.06056     | 3.22024     |
| N  | 2.01172     | 3.09425     | -0.86824    |
| N  | 5.51380     | 0.99712     | -0.22861    |
| N  | 2.97308     | -2.20275    | -0.87494    |
| N  | 4.58616     | -1.18082    | 3.21813     |
| N  | 0.93617     | -1.89118    | 2.92642     |
| N  | 4.04391     | 2.77202     | 2.93529     |
| N  | -0.55065683 | -0.14984895 | -0.18580358 |
| N  | -4.74453624 | -0.87372119 | -2.14563184 |

|   |             |             |             |
|---|-------------|-------------|-------------|
| N | -2.62213067 | 1.23647304  | -2.20050791 |
| N | -3.62707304 | -0.58148361 | 0.61304373  |
| N | -2.08738774 | -2.23981736 | -2.06683011 |
| C | 1.12753     | 1.51610     | 2.47653     |
| C | 3.46006     | 1.92435     | 2.29912     |
| C | 2.16253     | 2.14408     | -0.18688    |
| C | 4.45297     | 0.78282     | 0.23590     |
| C | 2.82167     | -1.25444    | -0.19114    |
| C | 3.85308     | -0.63414    | 2.47528     |
| C | 1.52102     | -1.04175    | 2.29353     |
| C | 0.51640898  | 0.03342896  | 0.30955173  |
| C | -4.84674648 | 0.34335312  | -2.96683582 |
| C | -4.07459801 | 1.54643161  | -2.38712918 |
| C | -4.81651567 | -1.43919134 | 0.31196397  |
| C | -5.57773866 | -0.94152950 | -0.93424277 |
| C | -2.99774987 | -2.31829780 | -3.25251903 |
| C | -4.47547228 | -2.13845168 | -2.84870756 |
| H | 6.44244     | 1.20578     | -0.61464    |
| H | 3.09797     | -3.03771    | -1.45978    |
| H | 1.88728     | 3.93080     | -1.45089    |
| H | -0.21270    | 2.53644     | 3.89787     |
| H | 5.19189     | -1.65870    | 3.89489     |
| H | -3.10146708 | -0.95803507 | 1.42335543  |
| H | -3.92775697 | 0.37857358  | 0.87050650  |
| H | -1.09650135 | -2.31523364 | -2.36218093 |
| H | -2.26779881 | -3.03014748 | -1.41762842 |
| H | -2.13449869 | 2.03347991  | -1.75162164 |
| H | -2.16180226 | 1.08154599  | -3.11833251 |
| H | -5.53043267 | -1.48391913 | 1.17197274  |
| H | -4.44706228 | -2.47761779 | 0.14850867  |
| H | -6.47943851 | -1.59631526 | -1.07505590 |
| H | -5.97701436 | 0.07992545  | -0.72828154 |
| H | -2.89290416 | -3.28877313 | -3.79866849 |
| H | -2.69122313 | -1.51636586 | -3.96268503 |
| H | -5.10477511 | -2.25316443 | -3.77218111 |
| H | -4.77064638 | -2.97977814 | -2.17738725 |
| H | -4.48825853 | 1.82359802  | -1.39045267 |
| H | -4.23299669 | 2.42819962  | -3.05691868 |
| H | -5.91265455 | 0.65979774  | -3.12729257 |
| H | -4.44477367 | 0.11288167  | -3.98202885 |

N. Optimized Cu<sup>TB</sup>-Mo<sup>SA</sup> dimer 2 with seven-coordinated Mo. Similar result is obtained for dimers 4, 5 and 6.

|    |           |           |           |
|----|-----------|-----------|-----------|
| 42 | 0.612406  | 1.987664  | -1.406392 |
| 29 | -0.758021 | -2.077826 | 1.648980  |
| 7  | 0.249830  | 3.797542  | 1.390572  |
| 7  | -2.306387 | 1.955170  | -3.020374 |
| 7  | 0.980350  | 3.641092  | -6.206413 |
| 7  | 3.527491  | 3.428856  | -2.156693 |
| 7  | 1.567445  | -0.151985 | -3.798049 |
| 7  | 2.668273  | 0.192366  | 0.482043  |
| 7  | -0.084984 | 5.059526  | -2.352788 |

|   |           |           |           |
|---|-----------|-----------|-----------|
| 7 | -0.799609 | -0.503610 | 0.340145  |
| 7 | -0.600956 | -3.753849 | 2.979404  |
| 7 | -2.514398 | -1.608081 | 2.818664  |
| 7 | 1.146132  | -1.562548 | 2.432682  |
| 7 | -1.136199 | -3.580185 | 0.164260  |
| 6 | -0.428779 | 0.403373  | -0.343516 |
| 6 | 0.345333  | 3.129908  | 0.421084  |
| 6 | 0.179551  | 3.928890  | -2.041637 |
| 6 | -1.273003 | 1.963357  | -2.449833 |
| 6 | 0.965192  | 2.960323  | -5.231012 |
| 6 | 2.490926  | 2.926318  | -1.907271 |
| 6 | 1.191972  | 0.627051  | -2.993694 |
| 6 | 2.048536  | 0.917585  | -0.236308 |
| 6 | -1.877949 | -3.786036 | 3.798612  |
| 6 | -2.379822 | -2.371604 | 4.107395  |
| 6 | 1.726269  | -2.808415 | 3.041904  |
| 6 | 0.630136  | -3.519035 | 3.838647  |
| 6 | -1.375159 | -4.887227 | 0.870699  |
| 6 | -0.452155 | -4.972894 | 2.089850  |
| 1 | 1.780401  | -1.134217 | 1.711968  |
| 1 | 0.986874  | -0.831301 | 3.154954  |
| 1 | -1.934484 | -3.305309 | -0.438229 |
| 1 | -0.286153 | -3.610253 | -0.432498 |
| 1 | -2.585651 | -0.585094 | 2.973820  |
| 1 | -3.353728 | -1.898607 | 2.278981  |
| 1 | 2.593882  | -2.581967 | 3.705394  |
| 1 | 2.118058  | -3.443963 | 2.216942  |
| 1 | 0.991762  | -4.492857 | 4.248486  |
| 1 | 0.324814  | -2.898073 | 4.710704  |
| 1 | -1.198272 | -5.762321 | 0.202560  |
| 1 | -2.447412 | -4.926959 | 1.162835  |
| 1 | -0.659665 | -5.897576 | 2.681785  |
| 1 | 0.611097  | -5.029665 | 1.765747  |
| 1 | -1.668723 | -1.818217 | 4.760280  |
| 1 | -3.344154 | -2.430191 | 4.665205  |
| 1 | -1.702956 | -4.360824 | 4.739942  |
| 1 | -2.647564 | -4.345415 | 3.221833  |
| 1 | 1.906063  | -0.740844 | -4.562034 |
| 1 | -3.180886 | 2.031411  | -3.545871 |
| 1 | 0.992081  | 4.229779  | -7.040619 |
| 1 | 0.172830  | 4.439711  | 2.183451  |
| 1 | 4.413268  | 3.891386  | -2.378308 |

O. Optimized Cu<sup>TB</sup>-Mo<sup>SA</sup> dimer1 with eight-coordinated Mo. A similar result is obtained for dimer 3.

|    |           |           |           |
|----|-----------|-----------|-----------|
| 42 | 0.088534  | -1.059029 | -2.314964 |
| 29 | -0.386513 | 0.617793  | 2.450605  |
| 7  | -0.807772 | -4.212219 | -1.569115 |
| 7  | -3.251751 | -1.080541 | -3.007725 |
| 7  | -0.258416 | -2.013588 | -5.588199 |
| 7  | 1.451525  | 1.435676  | -4.127086 |
| 7  | 2.857258  | -2.886916 | -2.992782 |
| 7  | 2.592912  | 0.107307  | -0.452978 |

|   |           |           |           |
|---|-----------|-----------|-----------|
| 7 | -1.274579 | 1.784983  | -1.161735 |
| 7 | -0.467484 | -0.781613 | 0.976706  |
| 7 | -0.229124 | 2.034262  | 4.070284  |
| 7 | 1.376315  | 1.548718  | 1.788545  |
| 7 | -0.976981 | -0.718244 | 3.966520  |
| 7 | -1.938420 | 1.940772  | 1.717104  |
| 6 | -0.864071 | 0.808587  | -1.715906 |
| 6 | -0.521300 | -3.079706 | -1.765411 |
| 6 | -2.083408 | -1.146471 | -2.823745 |
| 6 | -0.078618 | -1.606759 | -4.490348 |
| 6 | 0.953490  | 0.587617  | -3.471726 |
| 6 | 1.831888  | -2.336965 | -2.771397 |
| 6 | 1.795585  | -0.348204 | -1.220243 |
| 6 | -0.295156 | -1.007563 | -0.185540 |
| 6 | 1.045457  | 2.835524  | 3.853730  |
| 6 | 2.059803  | 2.032299  | 3.034024  |
| 6 | -1.171983 | 0.028060  | 5.261218  |
| 6 | -0.171424 | 1.186295  | 5.325969  |
| 6 | -1.824397 | 3.204431  | 2.508051  |
| 6 | -1.479107 | 2.886000  | 3.971342  |
| 1 | 3.769122  | -3.322573 | -3.151225 |
| 1 | -4.255930 | -0.978972 | -3.170386 |
| 1 | -0.410531 | -2.355850 | -6.540719 |
| 1 | -1.050816 | -5.191255 | -1.403310 |
| 1 | 1.880086  | 2.188825  | -4.669521 |
| 1 | -1.823135 | -1.244584 | 3.676193  |
| 1 | -0.194040 | -1.402261 | 4.019180  |
| 1 | -1.782378 | 2.067846  | 0.681426  |
| 1 | -2.844712 | 1.454684  | 1.860189  |
| 1 | 1.973368  | 0.910842  | 1.197722  |
| 1 | 1.094632  | 2.336534  | 1.170830  |
| 1 | -1.037670 | -0.638233 | 6.144915  |
| 1 | -2.223980 | 0.385796  | 5.296651  |
| 1 | -0.359671 | 1.825491  | 6.223299  |
| 1 | 0.868180  | 0.796940  | 5.418504  |
| 1 | -2.770452 | 3.796557  | 2.475335  |
| 1 | -1.046328 | 3.841647  | 2.032171  |
| 1 | -1.336938 | 3.825852  | 4.558323  |
| 1 | -2.316581 | 2.331967  | 4.449538  |
| 1 | 2.434114  | 1.143850  | 3.590475  |
| 1 | 2.951466  | 2.661182  | 2.798573  |
| 1 | 1.469565  | 3.140633  | 4.839412  |
| 1 | 0.777428  | 3.772385  | 3.316347  |

### S3. Absolute CASSCF and CASPT2 energies

**Table S3.** Absolute energies in a.u. of the five lowest doublet states calculated by using the CAS(3,3) level and the basis set shown in Table S1, for one of the Cu<sub>TB</sub>-Mo<sub>D</sub> dimers (dimer 5 according to Figure S1).

| State                                  | SA-CASSCF     | CASPT2        |
|----------------------------------------|---------------|---------------|
| Cu <sup>II</sup> -Mo <sup>IV-CS</sup>  | -6895.1928590 | -6899.1838542 |
| Cu <sup>II</sup> -Mo <sup>IV-T</sup>   | -6895.1138200 | -6899.0908643 |
| Cu <sup>II</sup> -Mo <sup>IV-OS</sup>  | -6895.0902880 | -6899.0725897 |
| Cu <sup>II</sup> -Mo <sup>IV-CS*</sup> | -6894.9416940 | -6898.9188689 |
| MMCT                                   | -6894.7578030 | (a)           |

a) CASPT2(3,3) calculation for the MMCT state was not successful because of intruder state problems.

**Table S4.** Absolute energies in a. u. of the five lowest doublet states calculated by using the CAS(3,3) level and the basis set shown in Table S1, for one of the Cu<sub>TB</sub>-Mo<sub>SA</sub> dimers (dimer 5 according Figure S1).

| State                                  | SA-CASSCF     | CASPT2        |
|----------------------------------------|---------------|---------------|
| Cu <sup>II</sup> -Mo <sup>IV-CS</sup>  | -6895.1664640 | -6899.1065095 |
| Cu <sup>II</sup> -Mo <sup>IV-T</sup>   | -6895.1629010 | -6899.0891151 |
| Cu <sup>II</sup> -Mo <sup>IV-OS</sup>  | -6895.1323050 | -6899.0644945 |
| Cu <sup>II</sup> -Mo <sup>IV-CS*</sup> | -6895.0546050 | -6898.9792330 |
| MMCT                                   | -6894.7594210 | (a)           |

a) CASPT2(3,3) calculation for the MMCT state was not successful because of intruder state problems.

**Table S5.** Absolute energies in a. u. of the five lowest doublet states calculated by using the CAS(3,3) level and the basis set shown in Table S1, for one of the Cu<sub>TD</sub>-Mo<sub>SA</sub> dimers (dimer 5 according Figure S1).

| State                                  | SA-CASSCF     | CASPT2        |
|----------------------------------------|---------------|---------------|
| Cu <sup>II</sup> -Mo <sup>IV-CS</sup>  | -6895.1864530 | -6899.1397170 |
| Cu <sup>II</sup> -Mo <sup>IV-T</sup>   | -6895.1150140 | -6899.0591778 |
| Cu <sup>II</sup> -Mo <sup>IV-OS</sup>  | -6895.0849870 | -6899.0346484 |
| Cu <sup>II</sup> -Mo <sup>IV-CS*</sup> | -6894.9369450 | -6898.8832756 |
| MMCT                                   | -6894.7834510 | (a)           |

a) CASPT2(3,3) calculation for the MMCT state was not successful because of intruder state problems.

**Table S6.** Absolute energies in a. u. of the five lowest doublet states calculated by using the CAS(3,3) level and the basis set shown in Table S1, for one of the Cu<sub>TB</sub>-Mo<sub>SA</sub> optimized dimers (dimer 2 according Figure S1) in which Mo is seven-coordinated.

| State                                  | SA-CASSCF    | CASPT2       |
|----------------------------------------|--------------|--------------|
| Cu <sup>II</sup> -Mo <sup>IV-T</sup>   | -6895.227059 | -6899.133391 |
| Cu <sup>II</sup> -Mo <sup>IV-CS</sup>  | -6895.194917 | -6899.107779 |
| Cu <sup>II</sup> -Mo <sup>IV-OS</sup>  | -6895.191826 | -6899.102881 |
| Cu <sup>II</sup> -Mo <sup>IV-CS*</sup> | -6895.152854 | -6899.068363 |
| MMCT                                   | -6894.817381 | (a)          |

a) CASPT2(3,3) calculation for the MMCT state was not successful because of intruder state problems.

**Table S7.** Absolute energies in a. u. of the five lowest doublet states calculated by using the CAS(3,3) level and the basis set shown in Table S1, for one of the Cu<sub>TB</sub>-Mo<sub>SA</sub> optimized dimers (dimer 2 according Figure S1) in which Mo is eight-coordinated.

| State                                 | SA-CASSCF    | CASPT2        |
|---------------------------------------|--------------|---------------|
| Cu <sup>II</sup> -Mo <sup>IV-CS</sup> | -6895.188998 | -6899.1422538 |

|                                        |              |               |
|----------------------------------------|--------------|---------------|
| Cu <sup>II</sup> -Mo <sup>IV-T</sup>   | -6895.173625 | -6899.1194506 |
| Cu <sup>II</sup> -Mo <sup>IV-OS</sup>  | -6895.143300 | -6899.0942095 |
| Cu <sup>II</sup> -Mo <sup>IV-CS*</sup> | -6895.063635 | -6899.0032938 |
| MMCT                                   | -6894.808241 | (a)           |

a) CASPT2(3,3) calculation for the MMCT state was not successful because of intruder state problems.

**Table S8.** Absolute energies in a. u. of the lowest energy doublet and quartet states, calculated at CASSCF and CASPT2 level, using a CAS(3,11) and the basis set shown in Table S2, for the optimized dimer with Mo seven-coordinated.

| State                                        | SA-CASSCF    | CASPT2       |
|----------------------------------------------|--------------|--------------|
| Doublet Cu <sup>II</sup> -Mo <sup>IV-T</sup> | -6895.285375 | -6899.377433 |
| Quartet Cu <sup>II</sup> -Mo <sup>IV-T</sup> | -6895.285407 | -6899.377593 |

**Table S9.** Relative CASPT2 energy (in eV) of the fifth doublet state (the MMCT state) with respect the ground state calculated by using the CAS(3,3) level and the basis set shown in Table S1, for one of the Cu<sub>TB</sub>-Mo<sub>D</sub> dimers (dimer 5 according to Figure S1). Relative energies of the rest of the states do not change more than 0.1 eV. At CASSCF level  $\Delta E$  is 11.8 eV

| Imaginary shift | $\Delta E$ CASPT2 | reference weight | CASPT2 convergence |
|-----------------|-------------------|------------------|--------------------|
| 0               | 4.4               | 0.01498          | NO                 |
| 0.1             | 2.7               | 0.17710          | NO                 |
| 0.2             | -7.7              | 0.16753          | NO                 |
| 0.3             | -4.7              | 0.27052          | NO                 |
| 0.4             | 3.9               | 0.40598          | YES                |
| 0.5             | 4.5               | 0.42531          | YES                |
| 0.6             | 5.0               | 0.44178          | YES                |
| 0.7             | 5.3               | 0.45768          | YES                |
| 0.8             | 5.7               | 0.47354          | YES                |
| 0.9             | 6.0               | 0.48947          | YES                |

**Table S10.** Absolute energies in a.u. and relative energies to the ground state in eV of the nine lowest doublet states calculated by using the CAS(11,12) level and the basis set shown in Table S1, for one of the Cu<sub>TB</sub>-Mo<sub>D</sub> dimers (dimer 5 according to Figure S1).

| State        | SA-CASSCF    | CASPT2       | $\Delta E$ SA-CASSCF | $\Delta E$ CASPT2 |
|--------------|--------------|--------------|----------------------|-------------------|
| ground state | -6895.380424 | -6899.120492 | 0.00                 | 0.00              |
| Cu-Cu        | -6895.344255 | -6899.070475 | 0.98                 | 1.36              |
| Cu-Cu        | -6895.344024 | -6899.070898 | 0.99                 | 1.35              |
| Cu-Cu        | -6895.335862 | -6898.938284 | 1.21                 | 4.96              |
| Mo-Mo        | -6895.335510 | -6899.058970 | 1.22                 | 1.67              |
| Mo-Mo        | -6895.289745 | -6899.021469 | 2.47                 | 2.69              |
| Mo-Mo, Cu-Cu | -6895.261506 | -6899.002254 | 3.24                 | 3.22              |
| Mo-Mo, Cu-Cu | -6895.253704 | -6898.971244 | 3.45                 | 4.06              |
| Mo-Mo, Cu-Cu | -6895.253477 | -6898.971615 | 3.45                 | 4.05              |

**Figure S2.** Active orbitals used in the calculations CAS(11,12) on the model dimers.



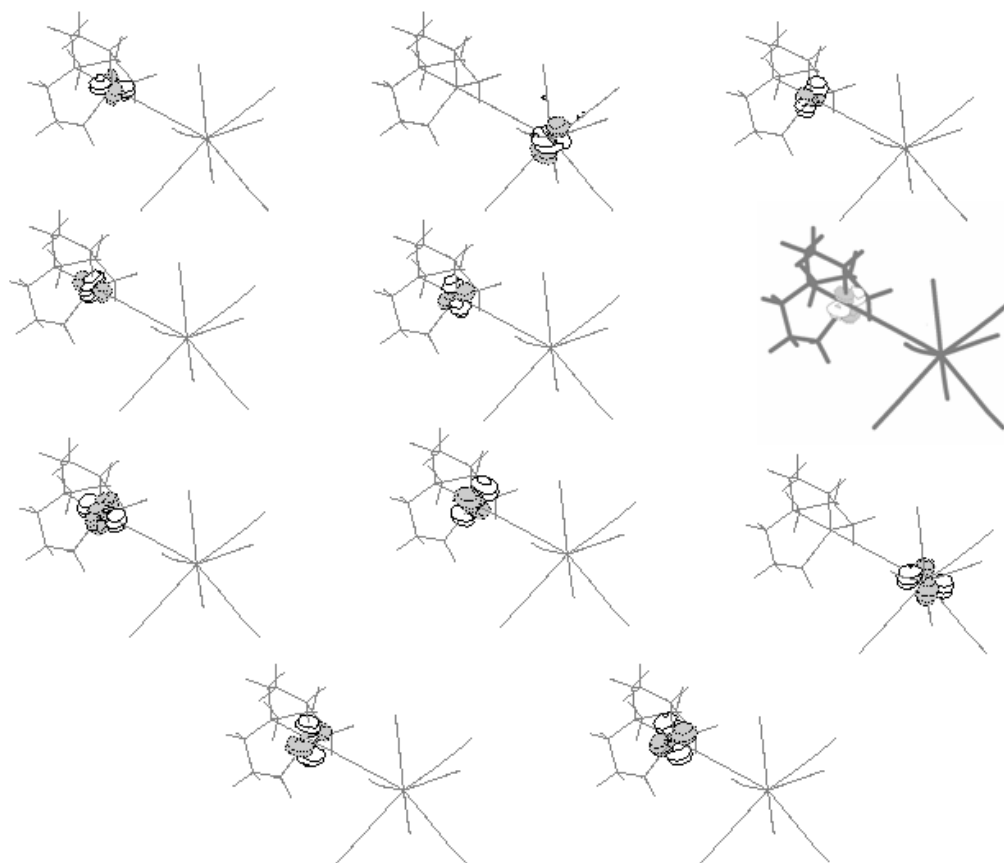

Supplement: c0cc00792g.pdf [file c0cc00792g.pdf]
